# Supplementary material for: A metal-free tandem cycloaddition strategy for the synthesis of indolizines from pyridine derivatives and γ-bromo-crotonates under mild conditions
Source: Royal Society of Chemistry journal article supplement (doi:10.1039/c3ra43613f), 2013-01-01

## Supporting Information

### Metal-Free Tandem Cycloaddition Strategy for the Synthesis of Indolizines from Pyridine Derivatives and $\gamma$ -Bromo-Crotonates under Mild Conditions

Yanqiu Li,<sup>a</sup> Bingchuan Yang,<sup>a</sup> Yan Sun,<sup>a</sup> Huayi Wang,<sup>a</sup> Huipeng Li,<sup>a</sup> Shuai Fang,<sup>a</sup> Xiaoyi

Niu,<sup>a</sup> and Chen Ma<sup>a,b\*</sup>

<sup>a</sup>School of Chemistry and Chemical Engineering, Shandong University, Jinan, 250100, P R China

<sup>b</sup>State Key Laboratory of Natural and Biomimetic Drugs, Peking University, Beijing, 100191, P R China. E-mail: chenma@sdu.edu.cn

#### Contents

1. Crystal data of compound **3b** P2
2. <sup>1</sup>H NMR, <sup>13</sup>C NMR, and HRMS spectra data of the products P2-P27

#### Appendix

Spectral Copies of <sup>1</sup>H NMR, <sup>13</sup>C NMR and HRMS of Compounds Obtained in this Study

**Table S1.** Details of Crystal Structure Determination for **3b**.

|                                                                               |                                                 |
|-------------------------------------------------------------------------------|-------------------------------------------------|
| Compound                                                                      | <b>3b</b>                                       |
| Chemical formula                                                              | C <sub>22</sub> H <sub>21</sub> NO <sub>4</sub> |
| Formula Mass                                                                  | 363.40                                          |
| Crystal system                                                                | Triclinic                                       |
| <i>a</i> /Å                                                                   | 7.5360(5)                                       |
| <i>b</i> /Å                                                                   | 8.5400(6)                                       |
| <i>c</i> /Å                                                                   | 15.3432(11)                                     |
| <i>α</i> /°                                                                   | 74.7452(7)                                      |
| <i>β</i> /°                                                                   | 77.1894(8)                                      |
| <i>γ</i> /°                                                                   | 83.1256(8)                                      |
| Unit cell volume/Å <sup>3</sup>                                               | 926.97(11)                                      |
| Temperature/K                                                                 | 293(2)                                          |
| Space group                                                                   | <i>P</i> $\bar{1}$                              |
| No. of formula units per unit cell, <i>Z</i>                                  | 2                                               |
| No. of reflections measured                                                   | 10932                                           |
| No. of independent reflections                                                | 4200                                            |
| <i>R</i> <sub>int</sub>                                                       | 0.0205                                          |
| Final <i>R</i> <sub><i>I</i></sub> values ( <i>I</i> > 2σ( <i>I</i> ))        | 0.0399                                          |
| Final <i>wR</i> ( <i>F</i> <sup>2</sup> ) values ( <i>I</i> > 2σ( <i>I</i> )) | 0.0948                                          |
| Final <i>R</i> <sub><i>I</i></sub> values (all data)                          | 0.0575                                          |
| Final <i>wR</i> ( <i>F</i> <sup>2</sup> ) values (all data)                   | 0.1048                                          |

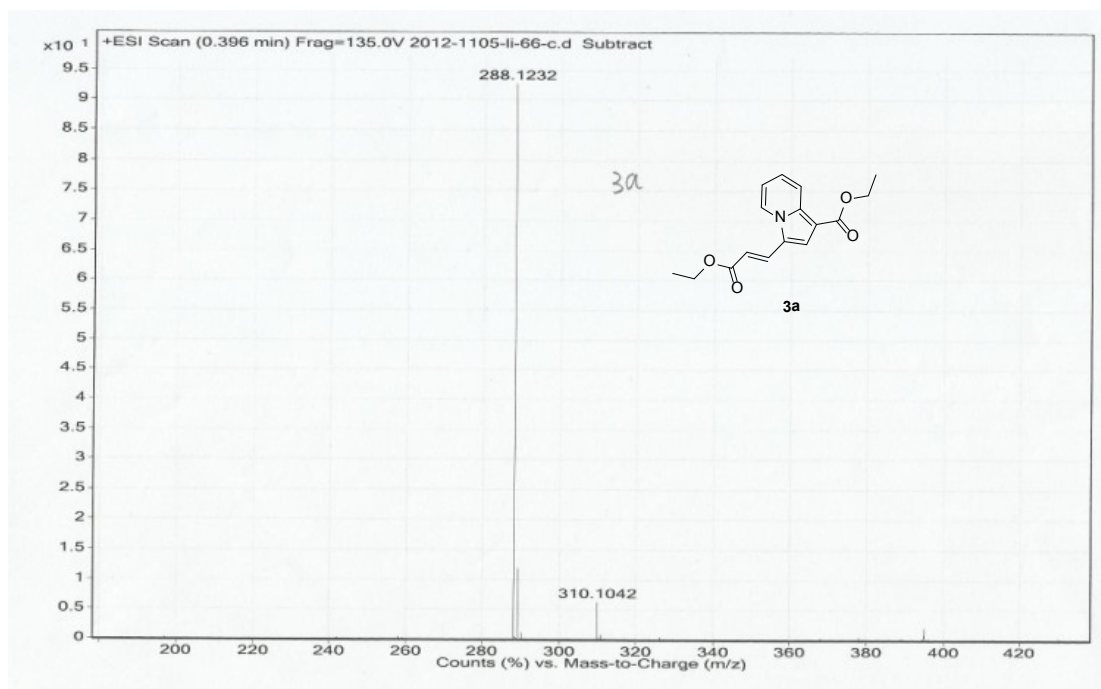

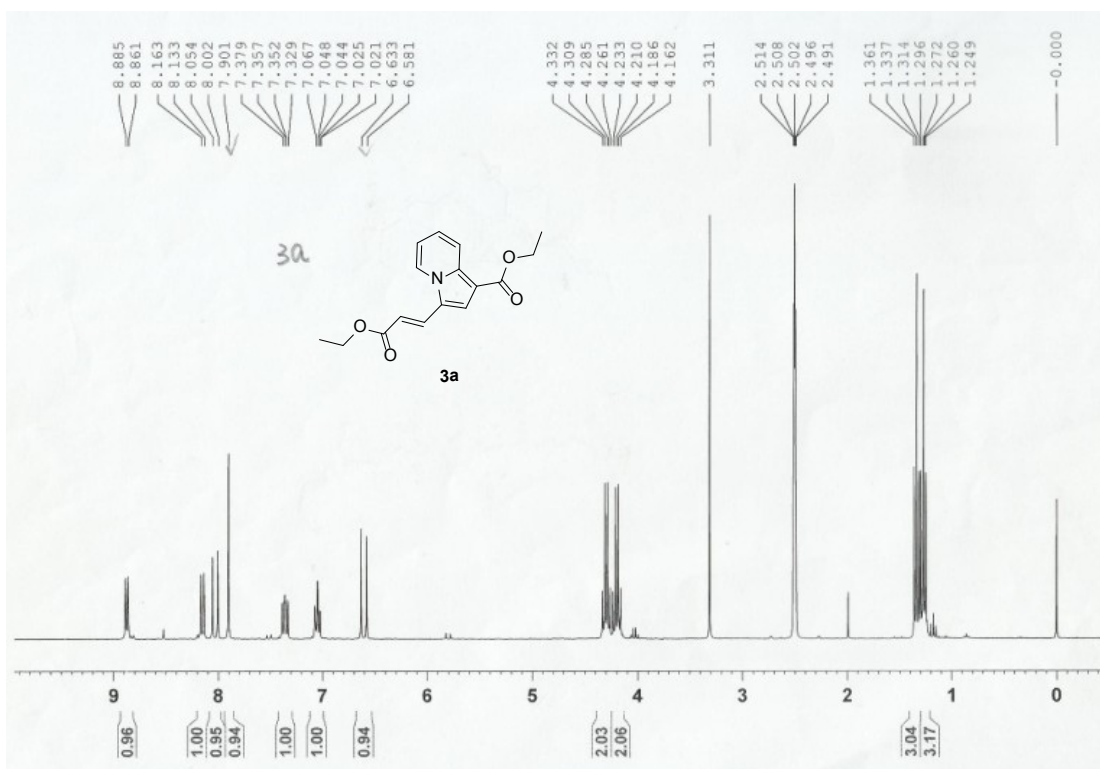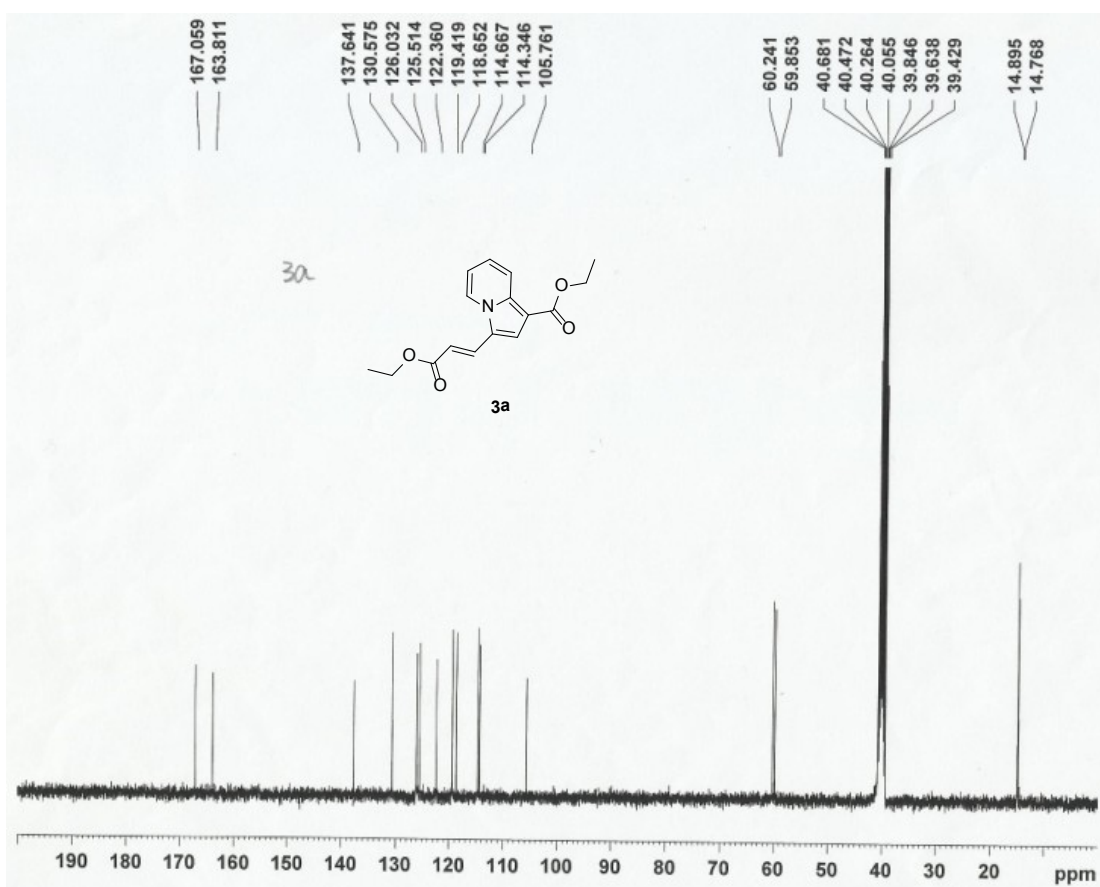

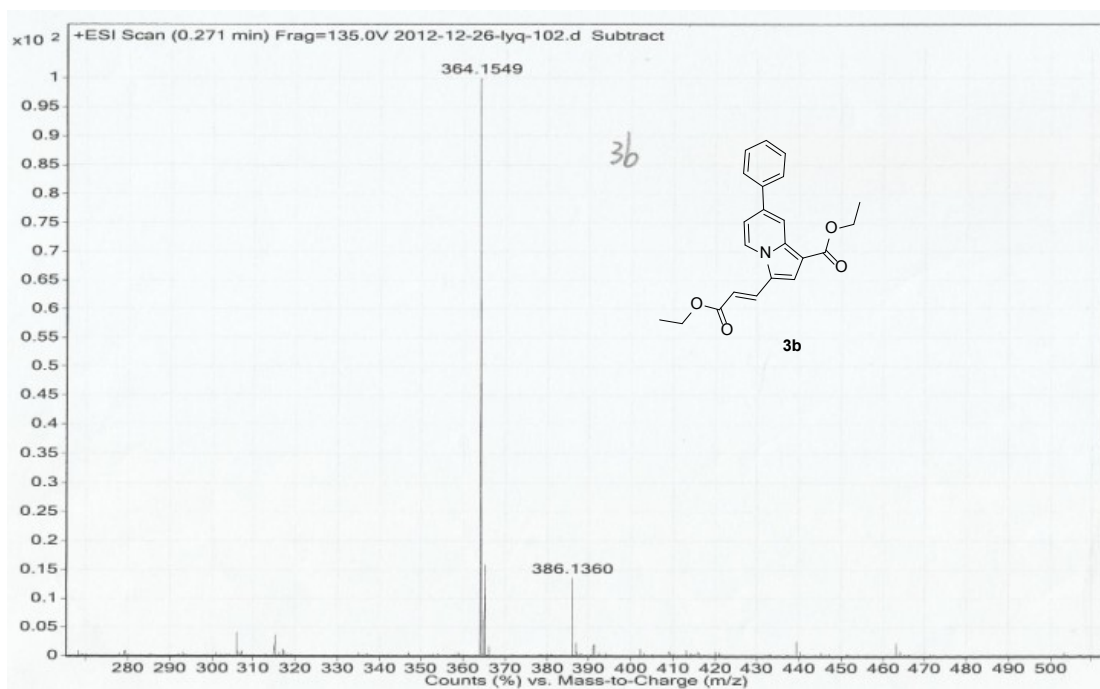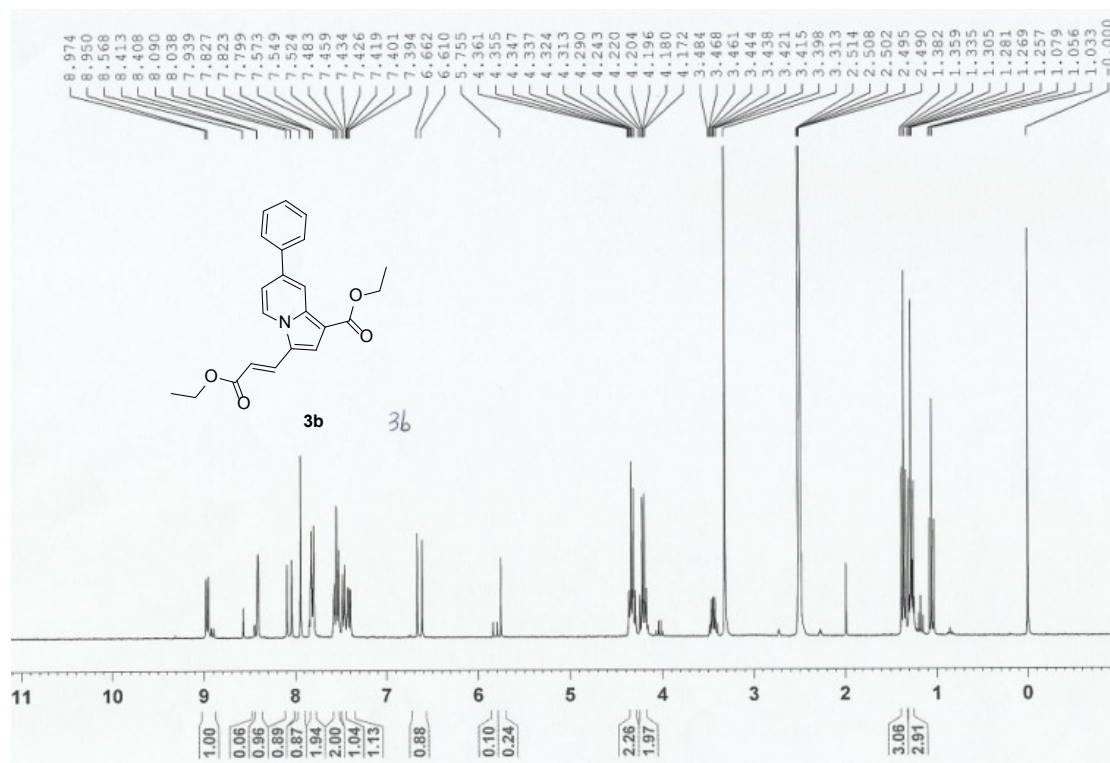

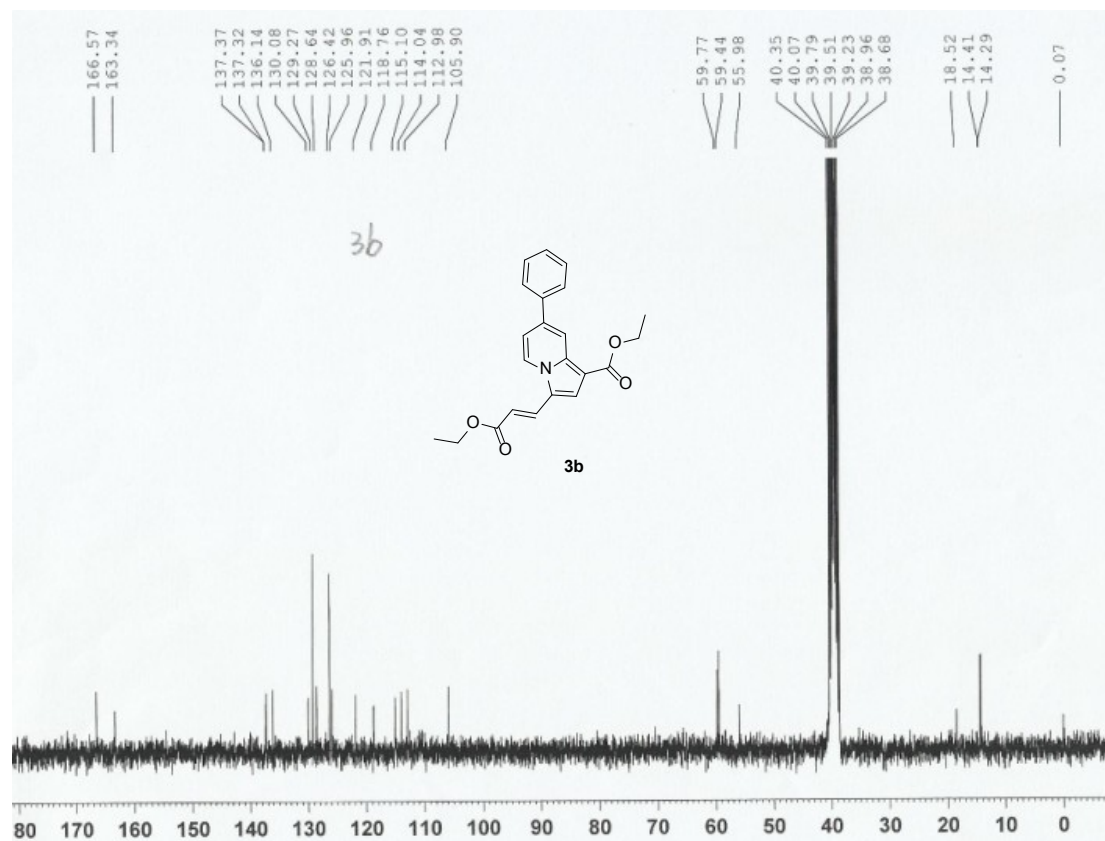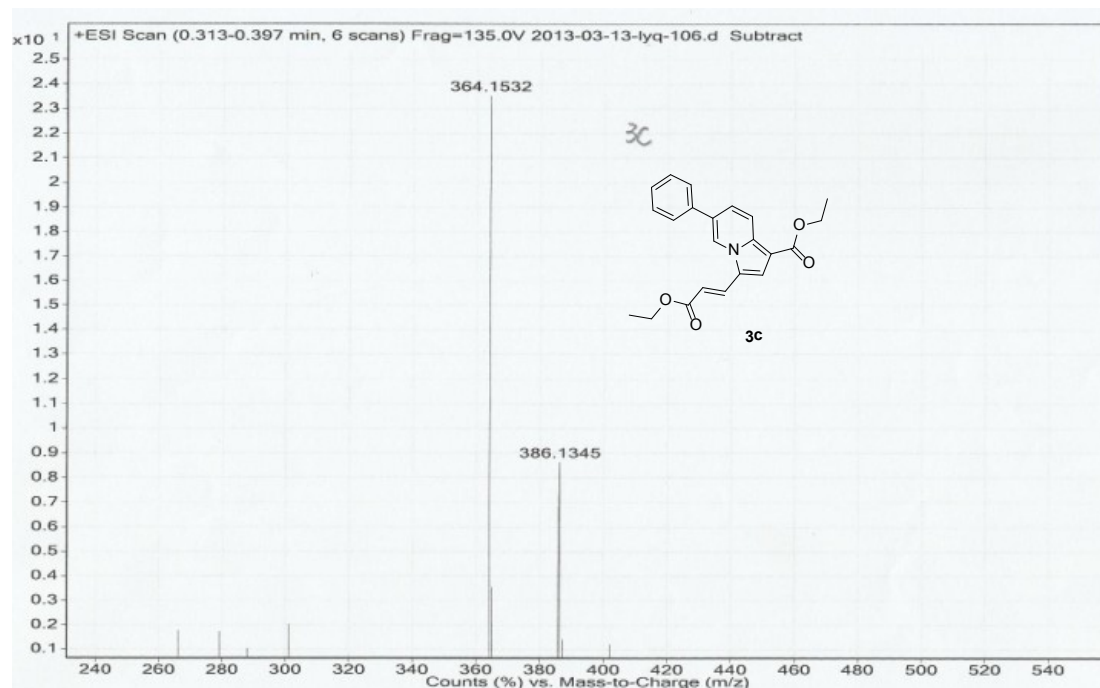

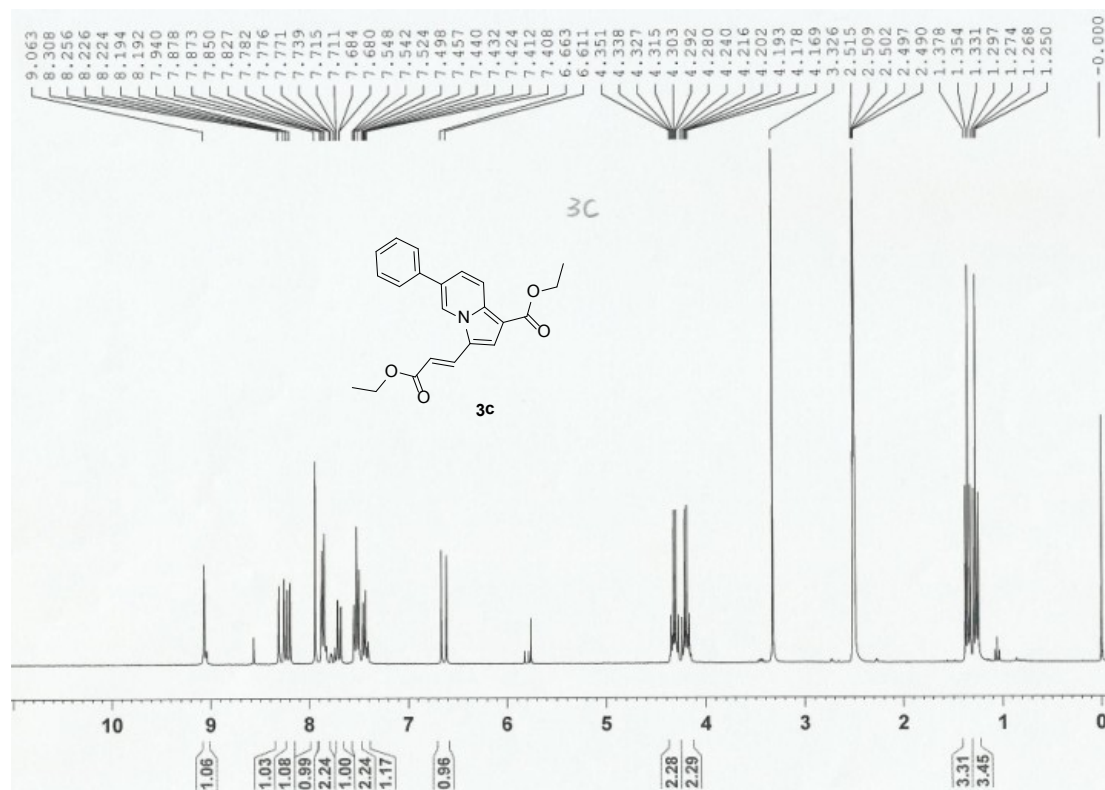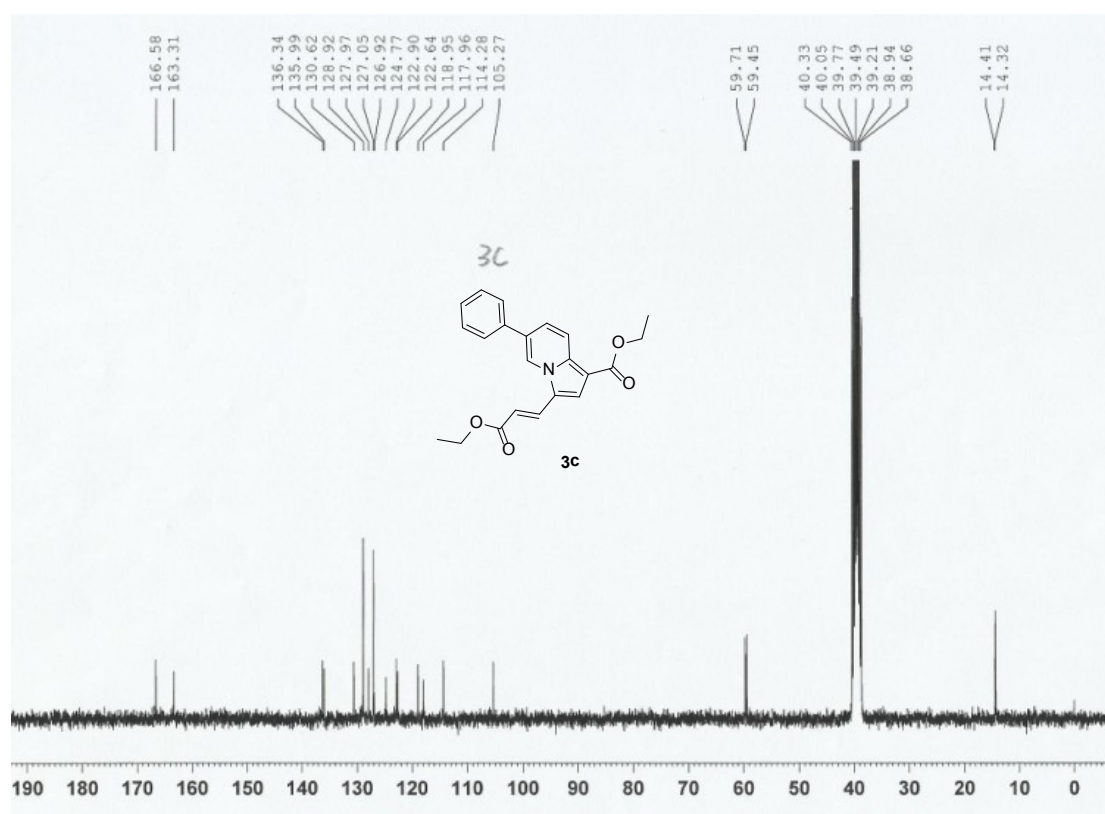



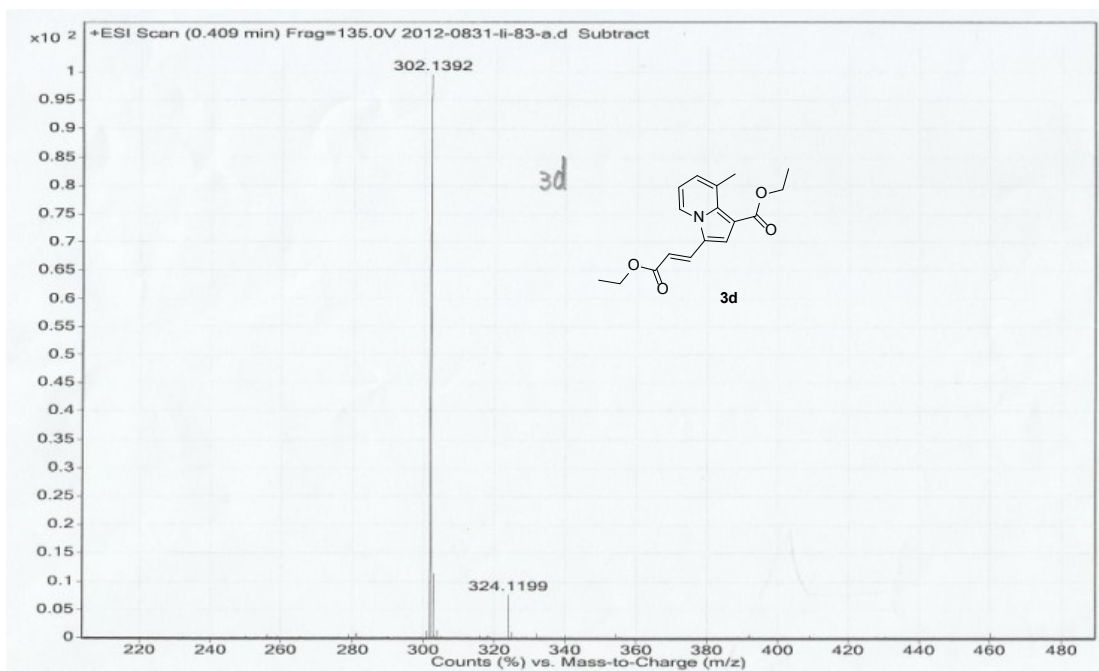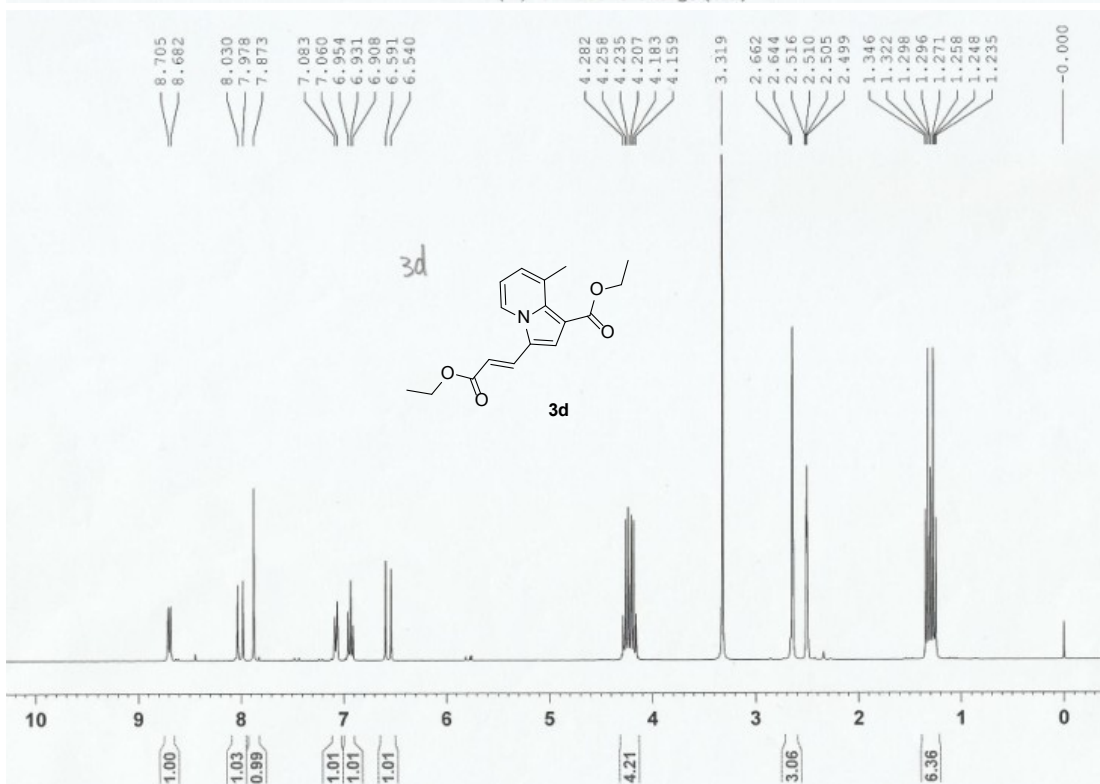

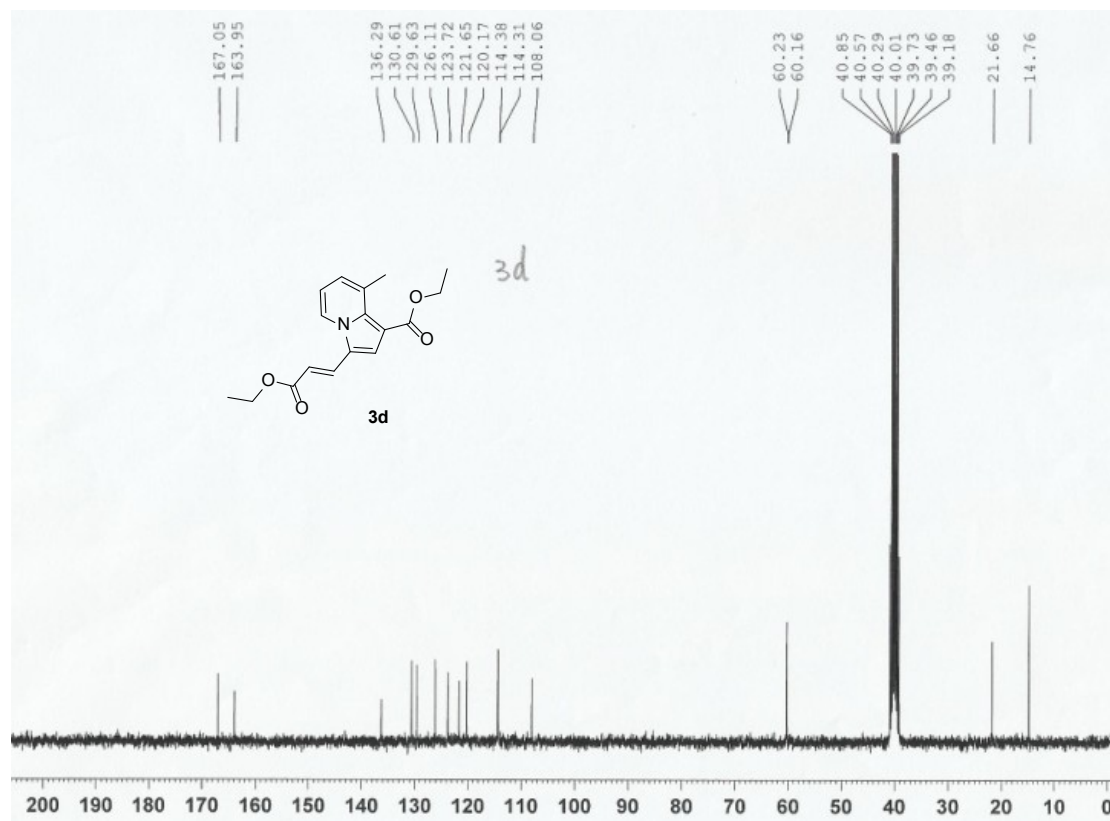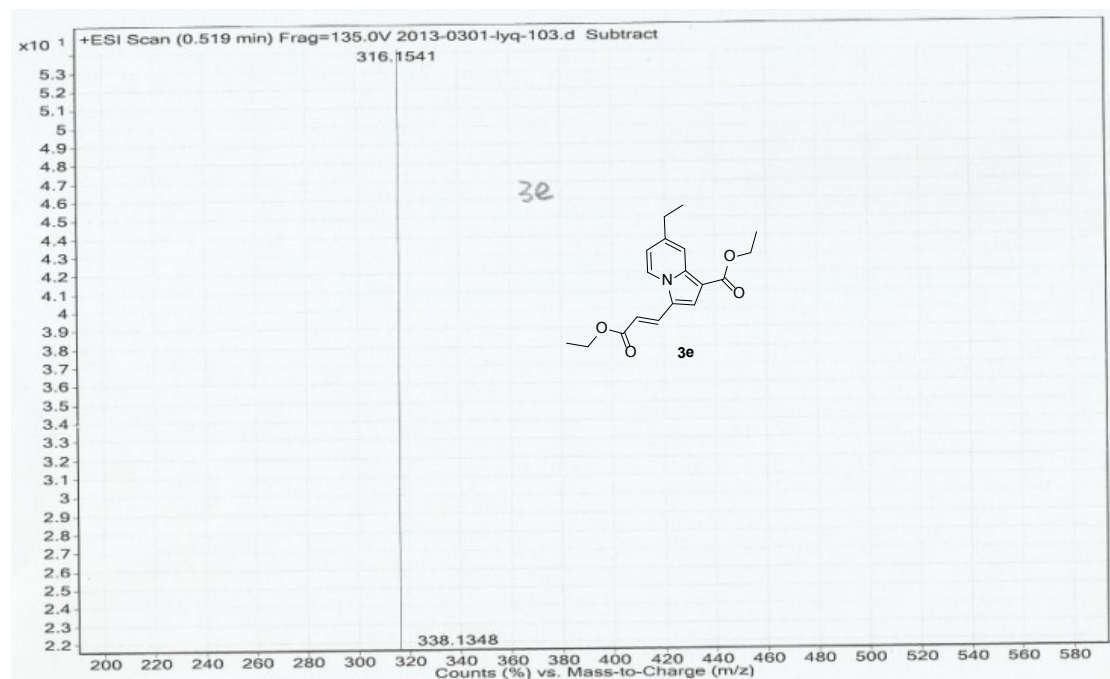



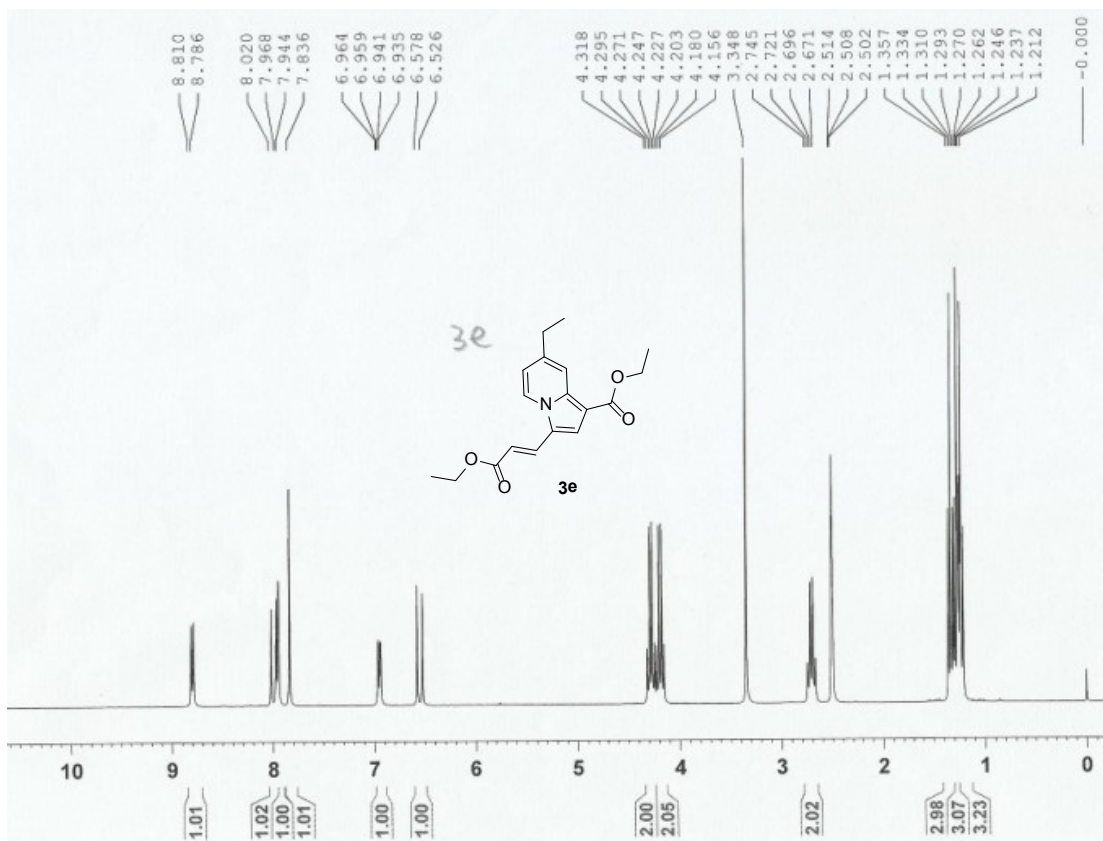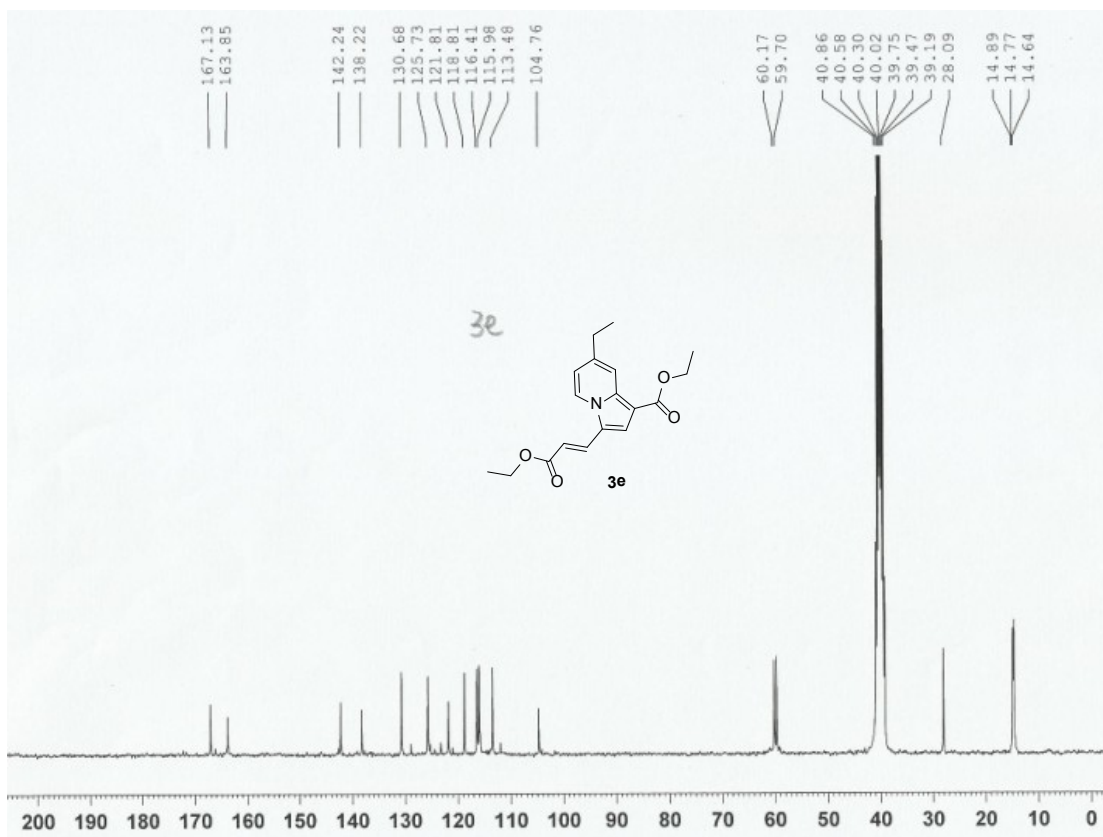

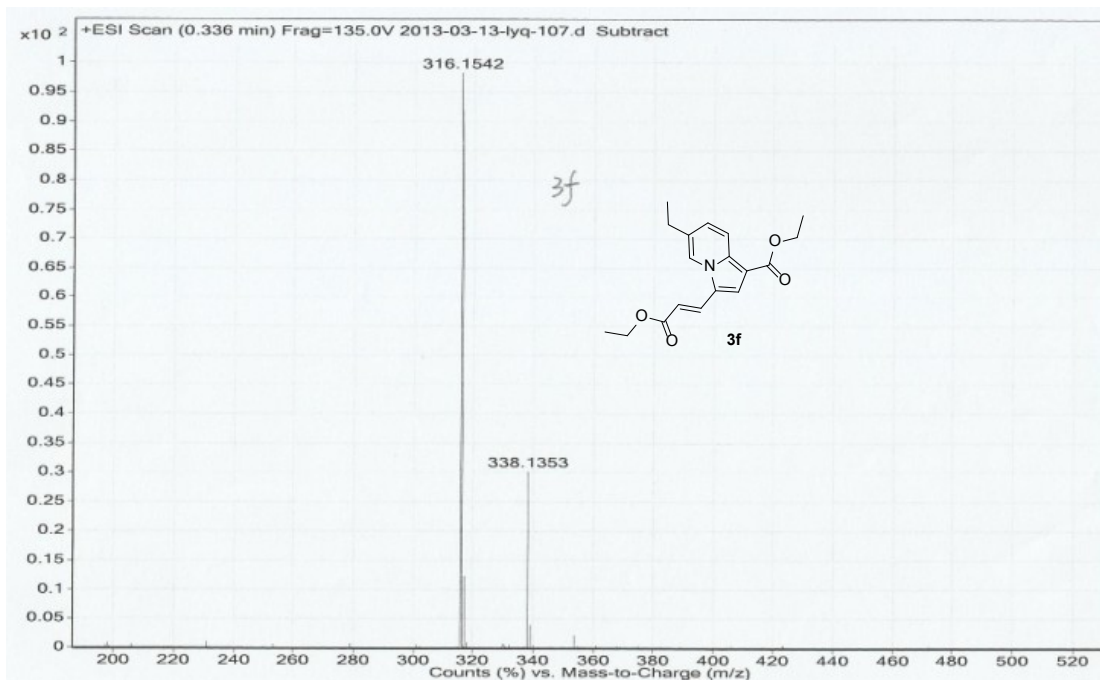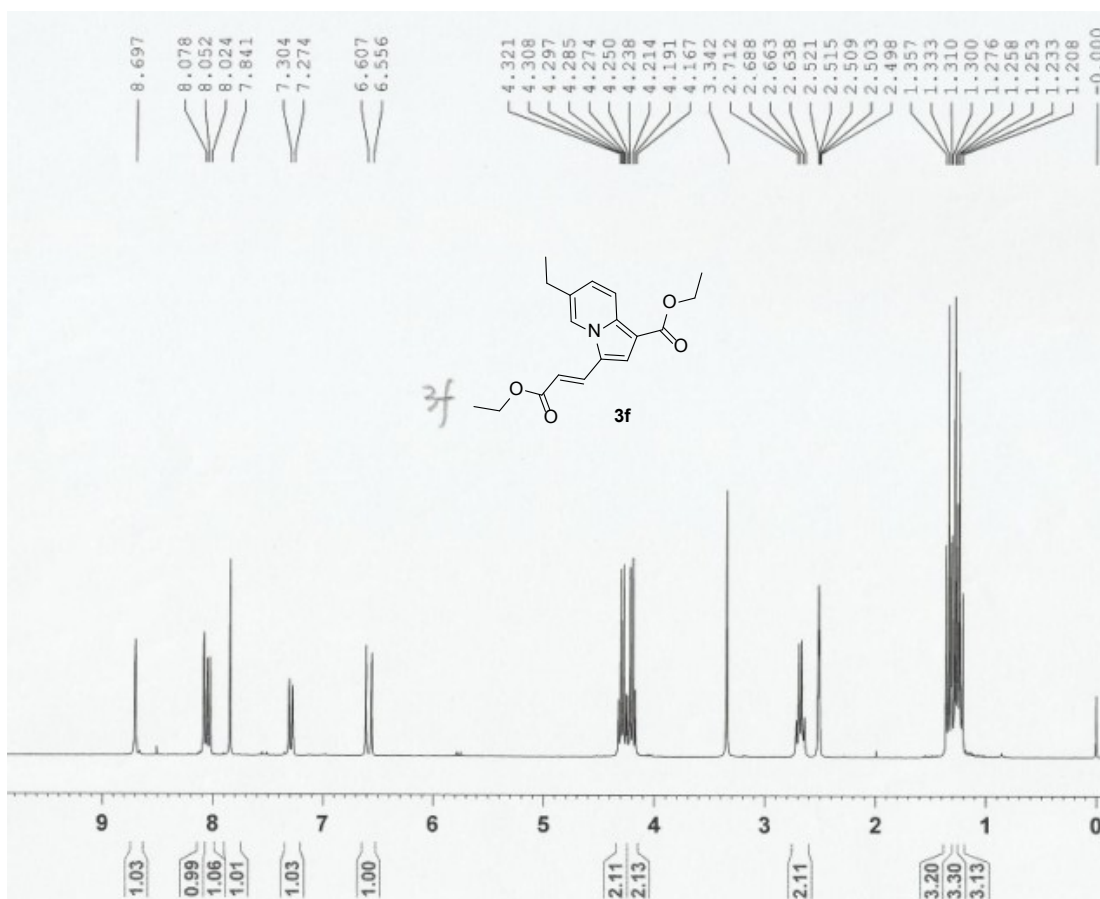

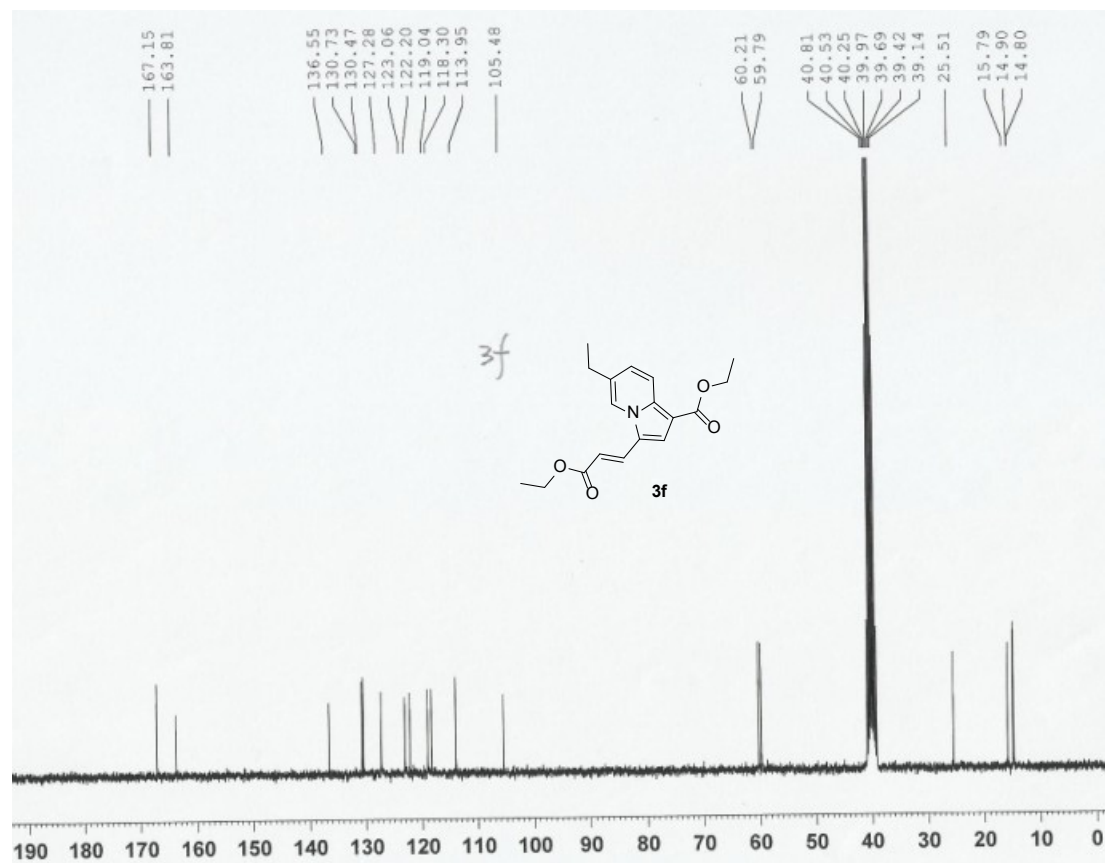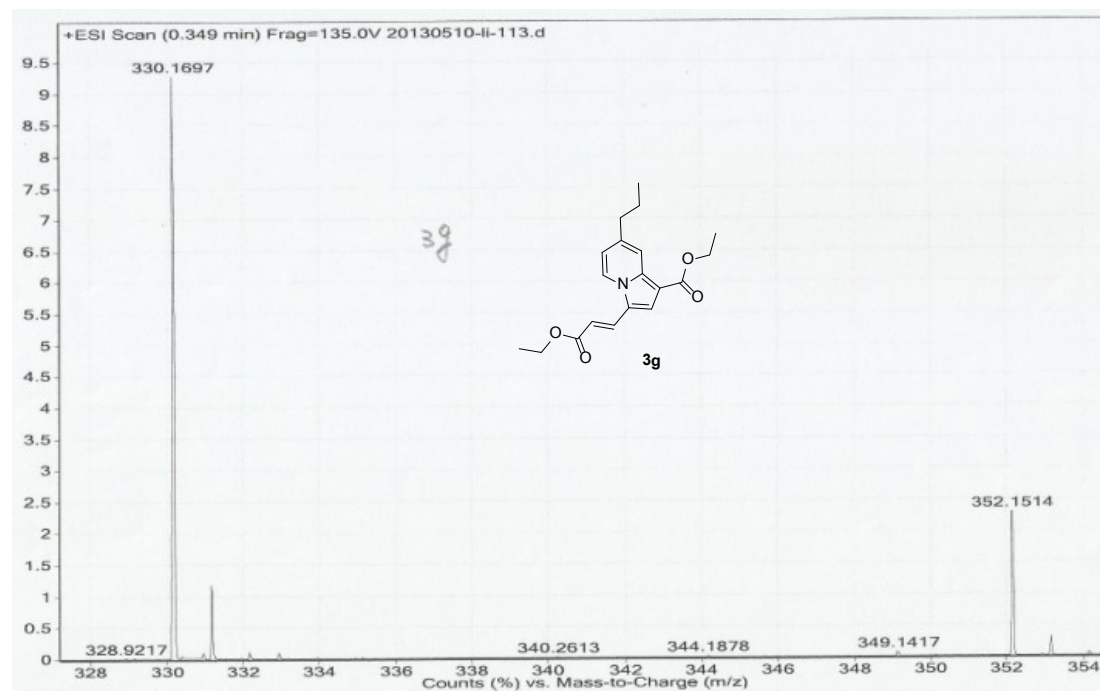

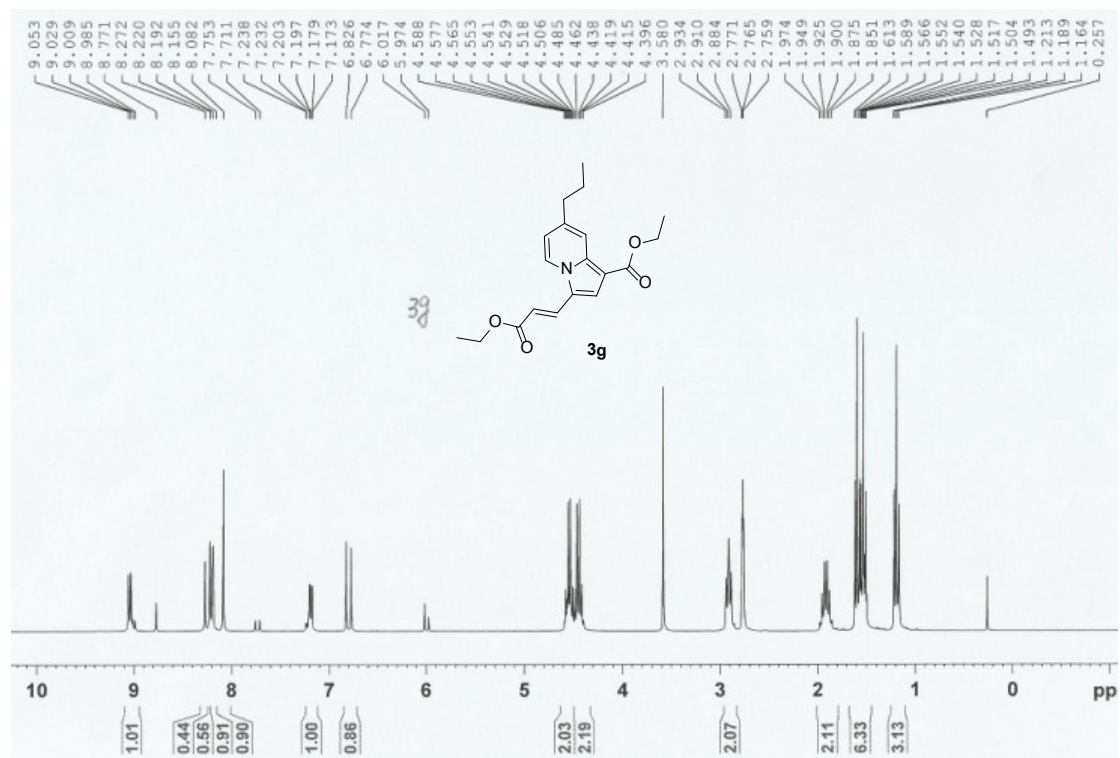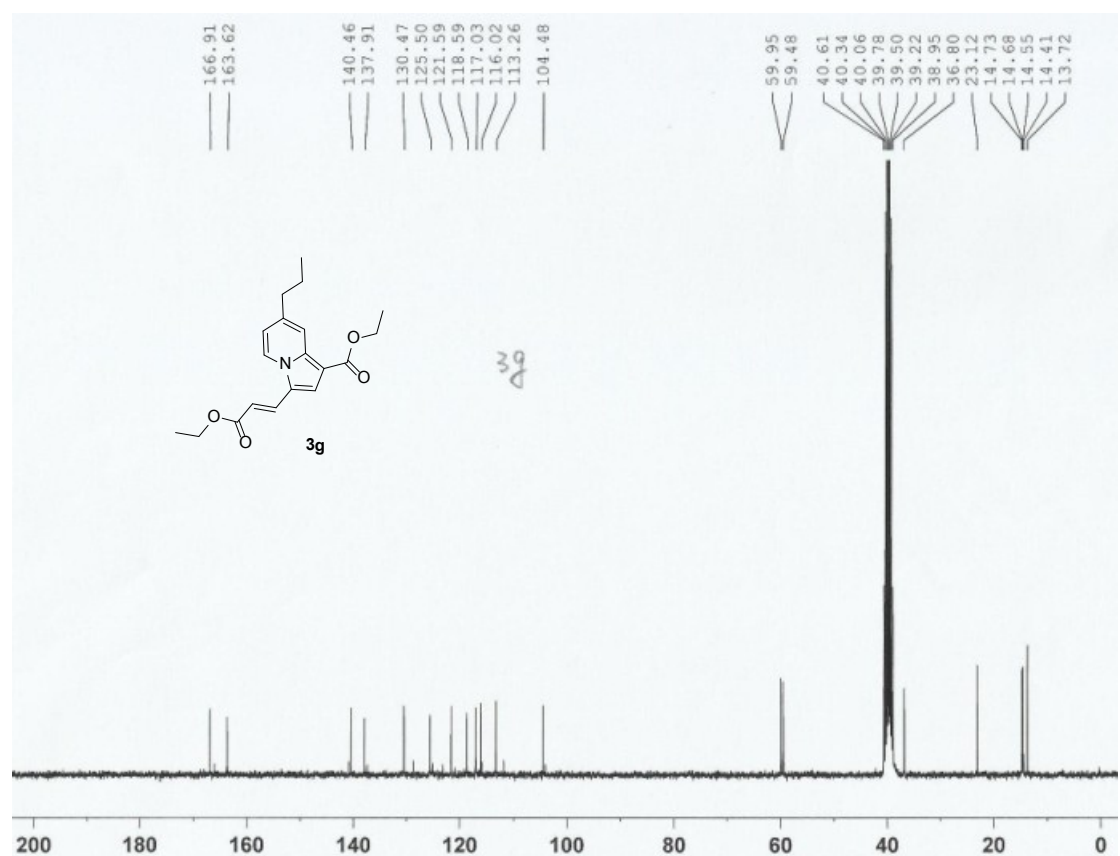

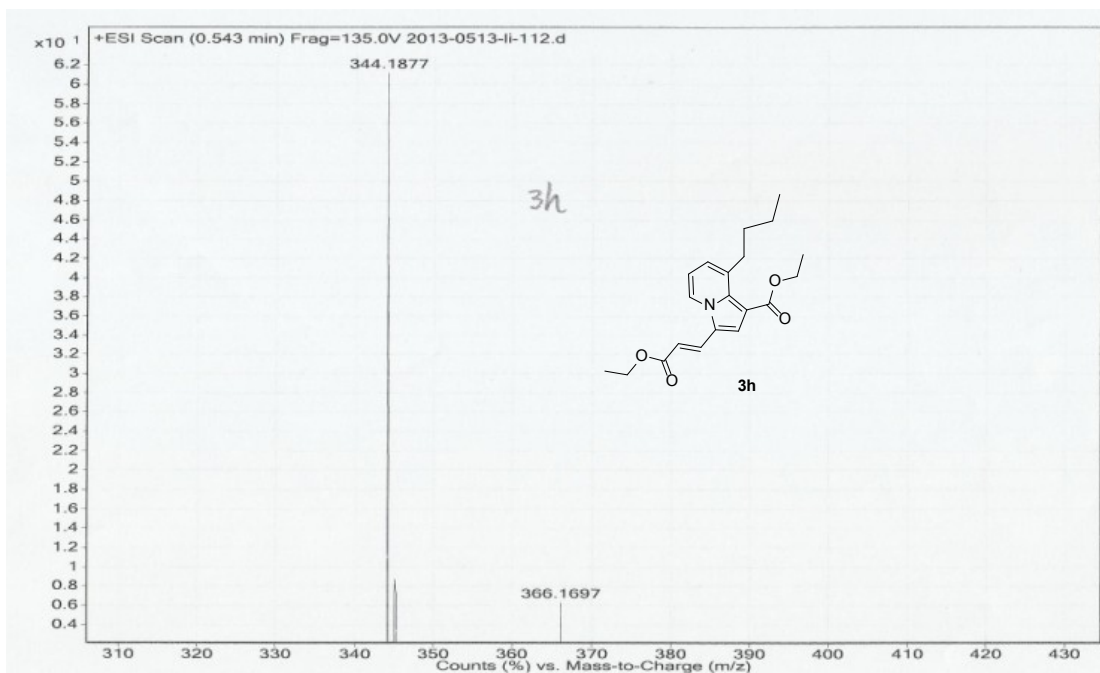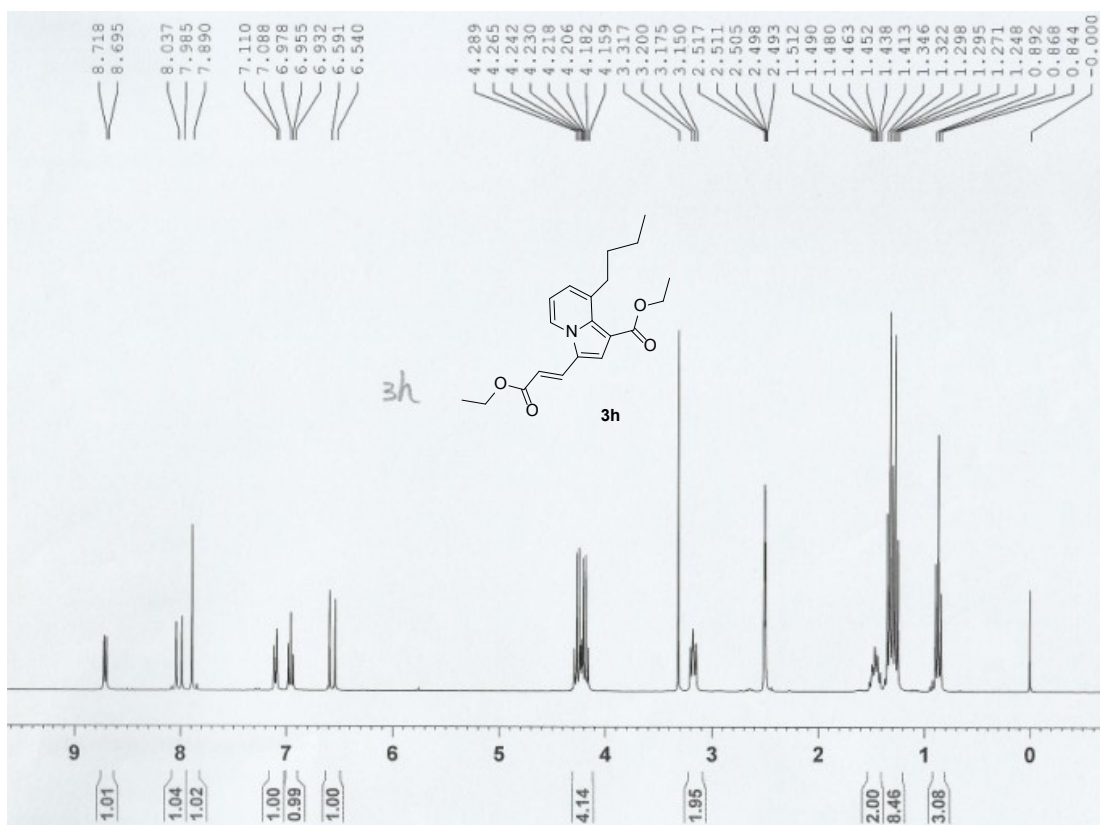



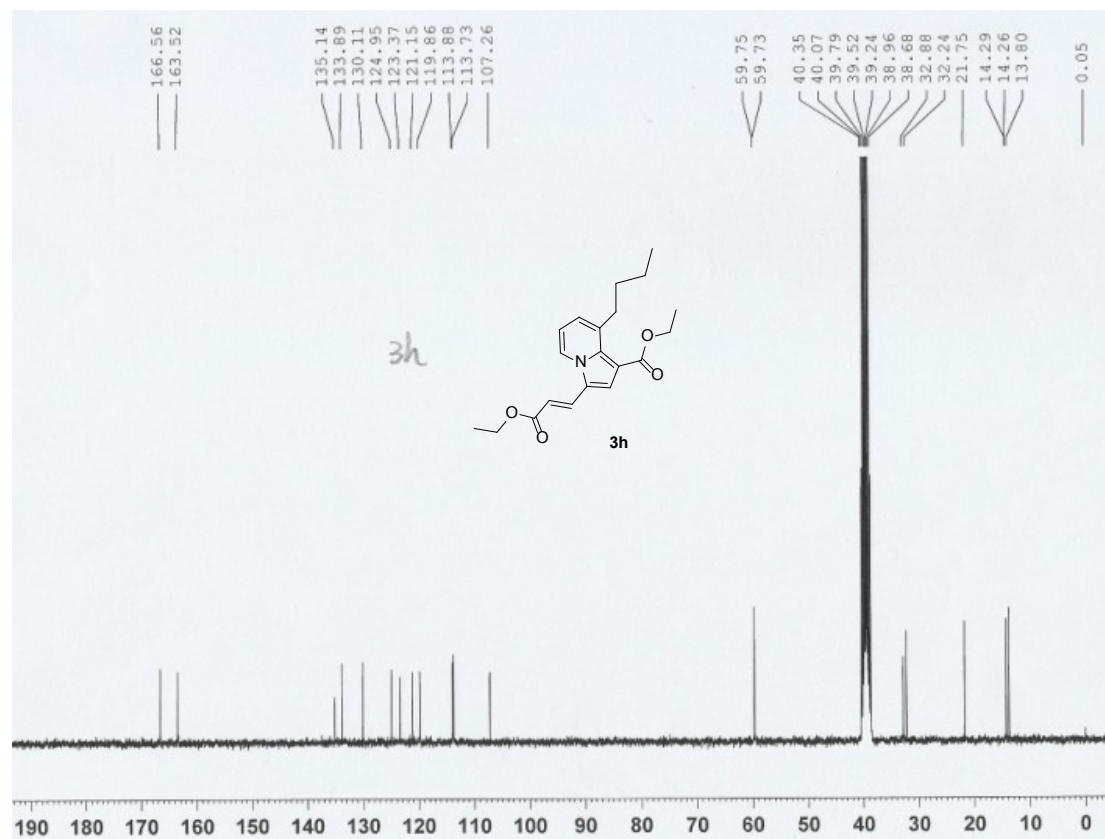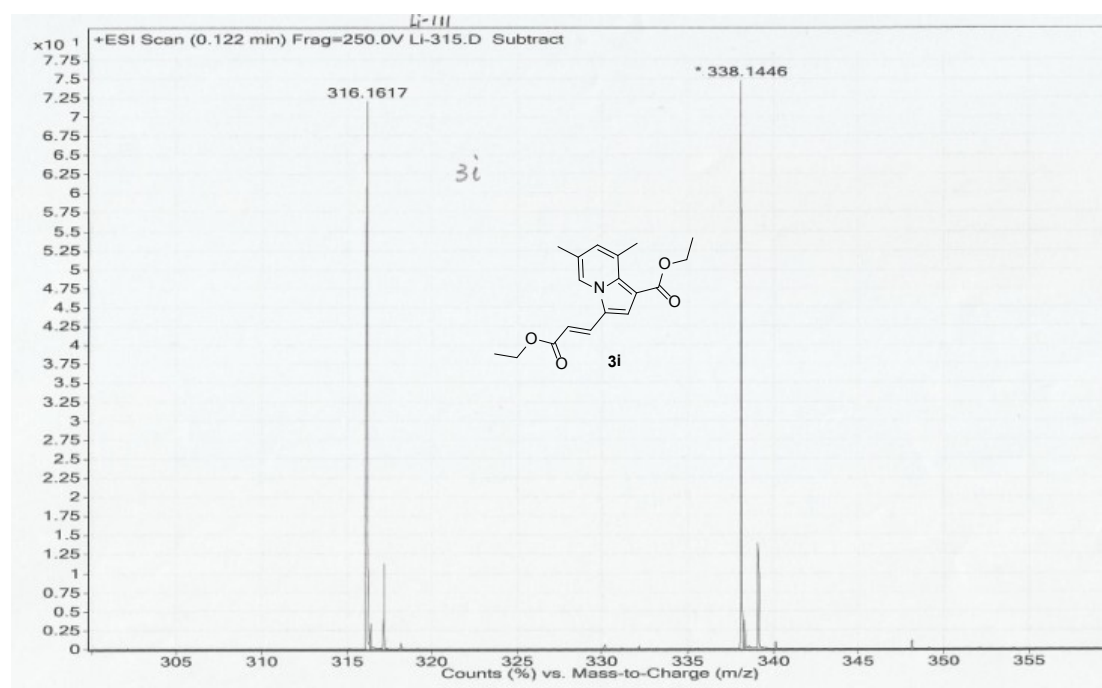



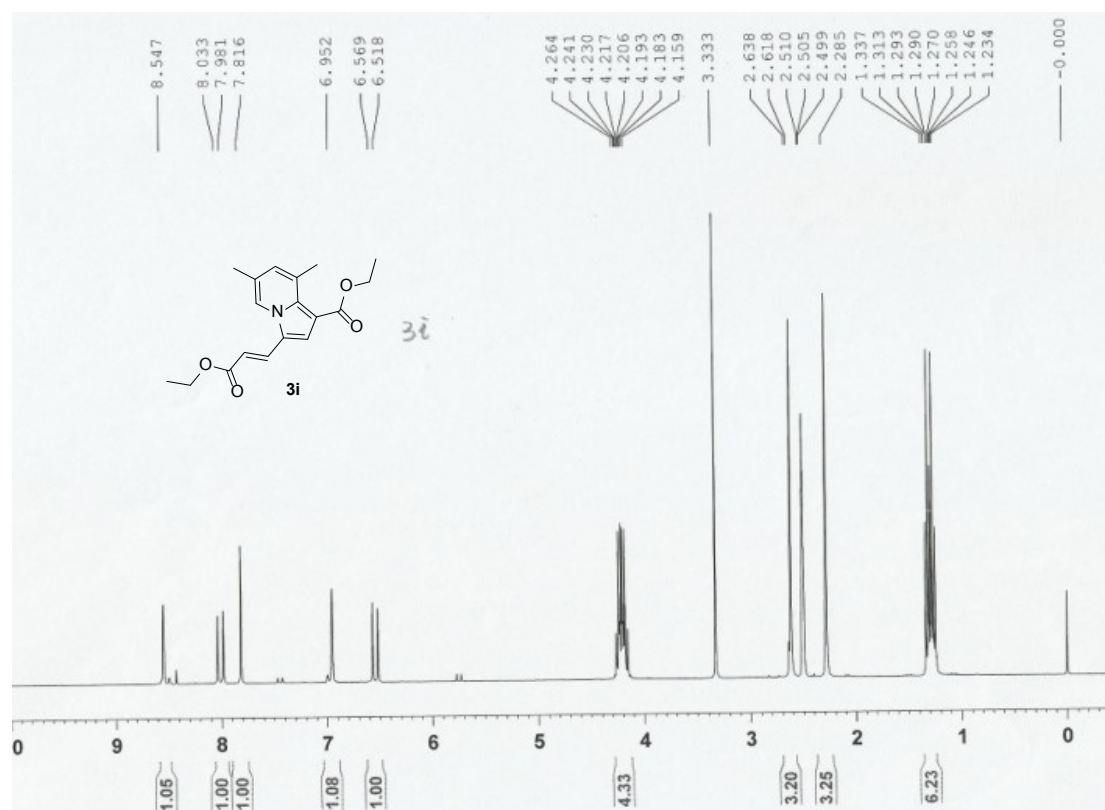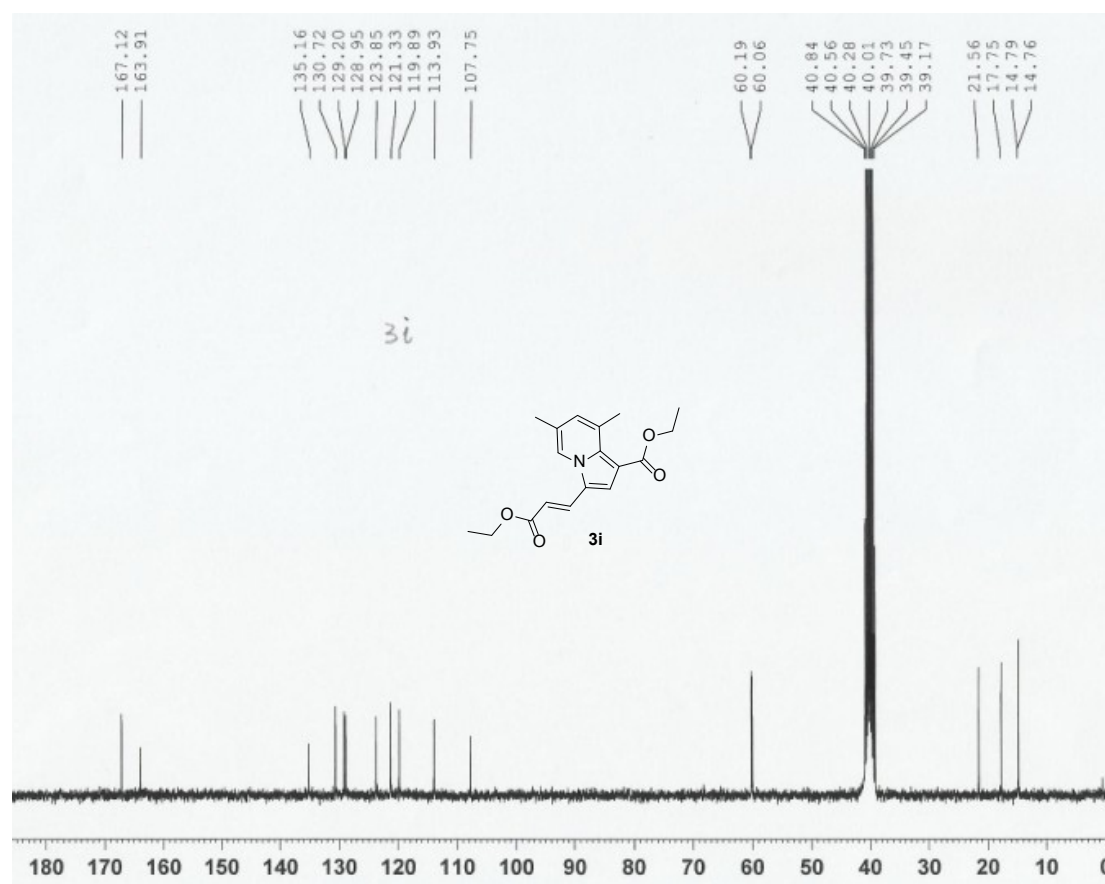

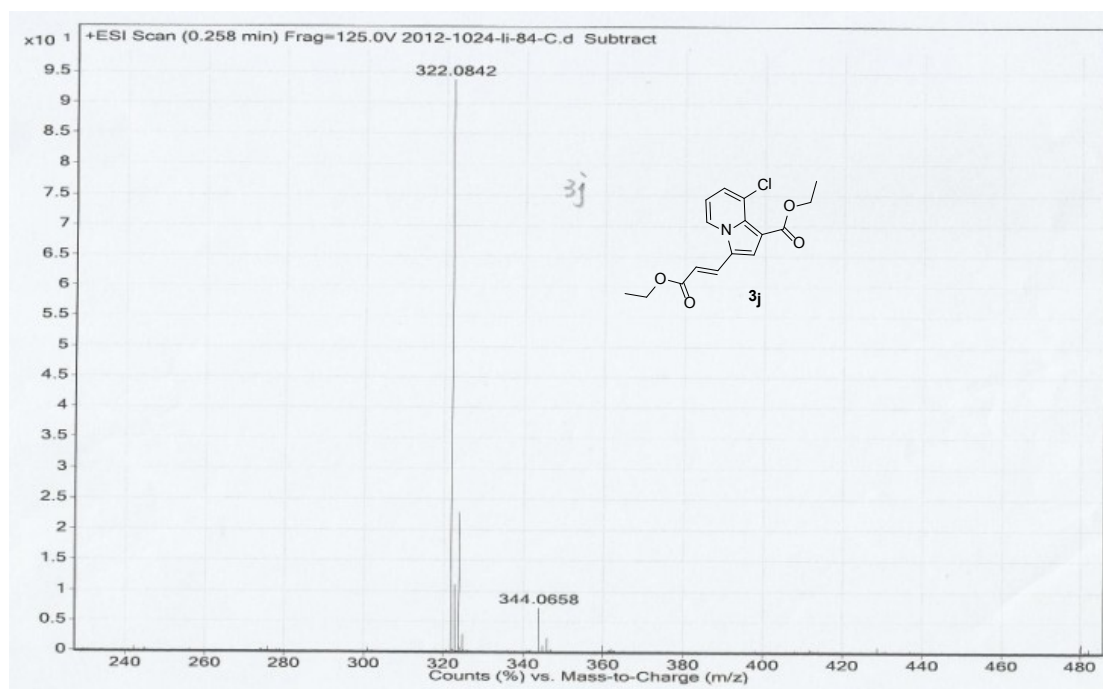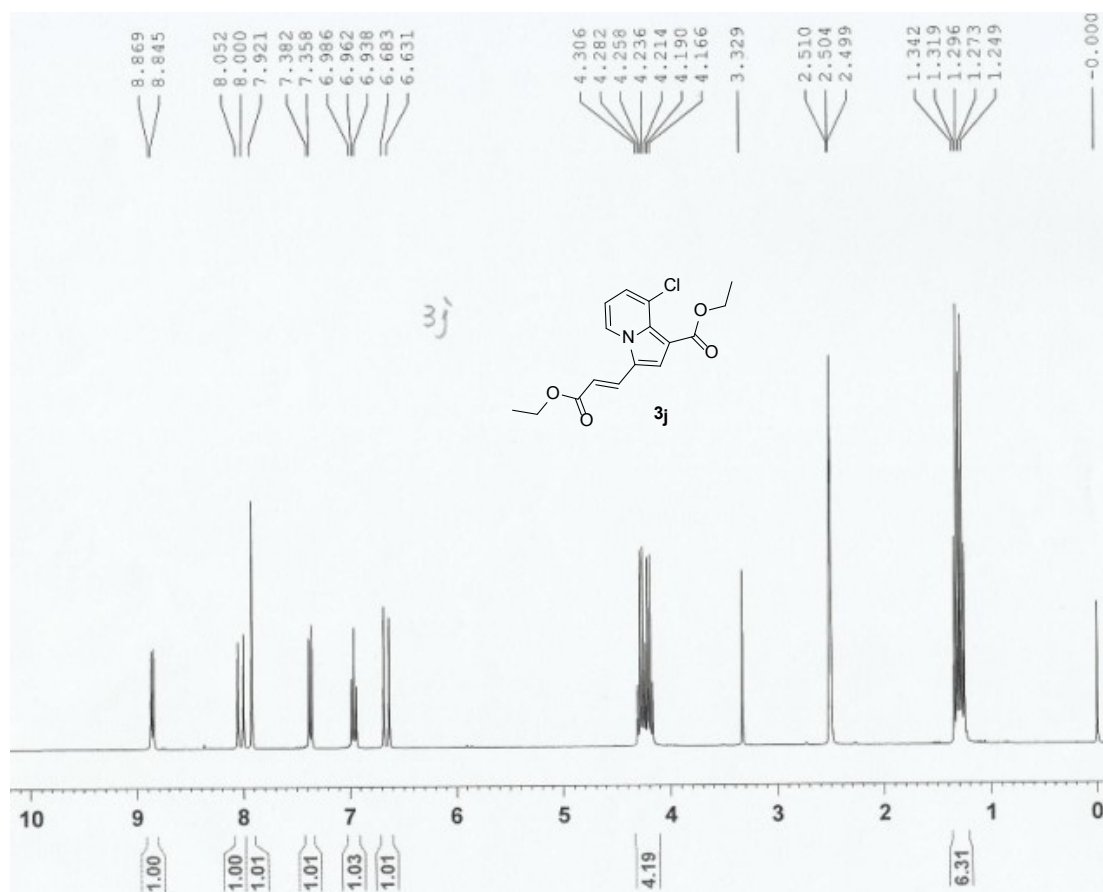

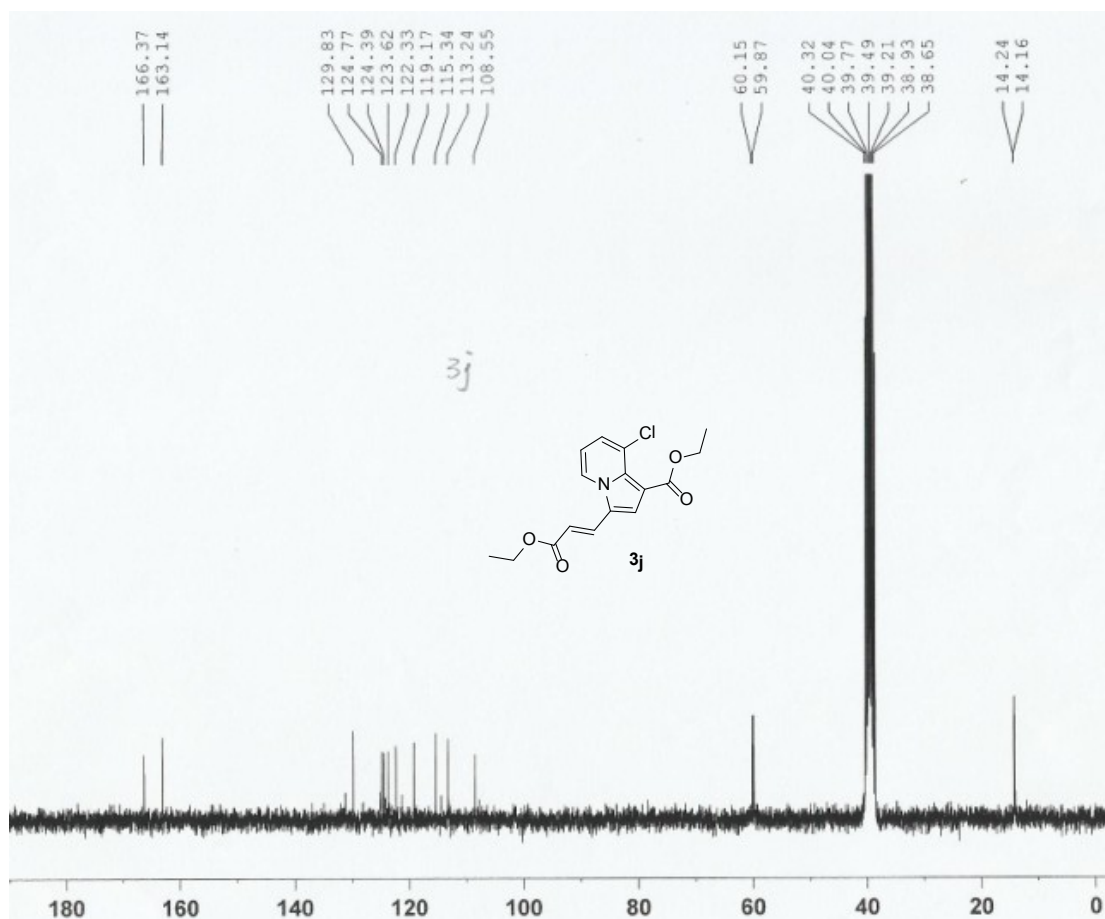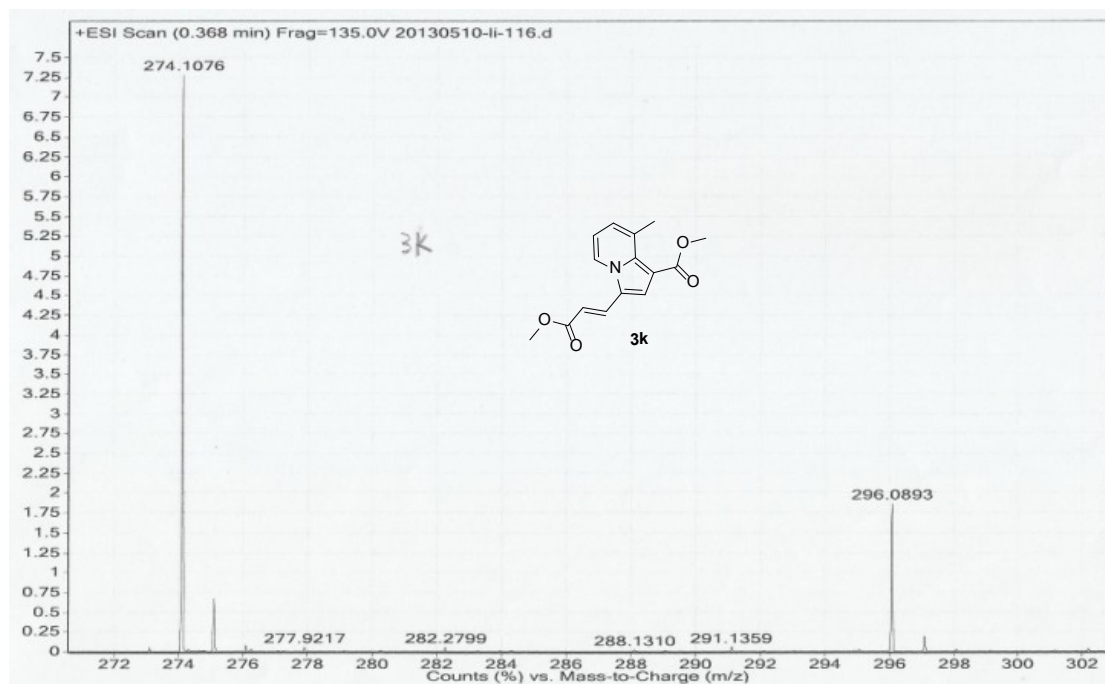

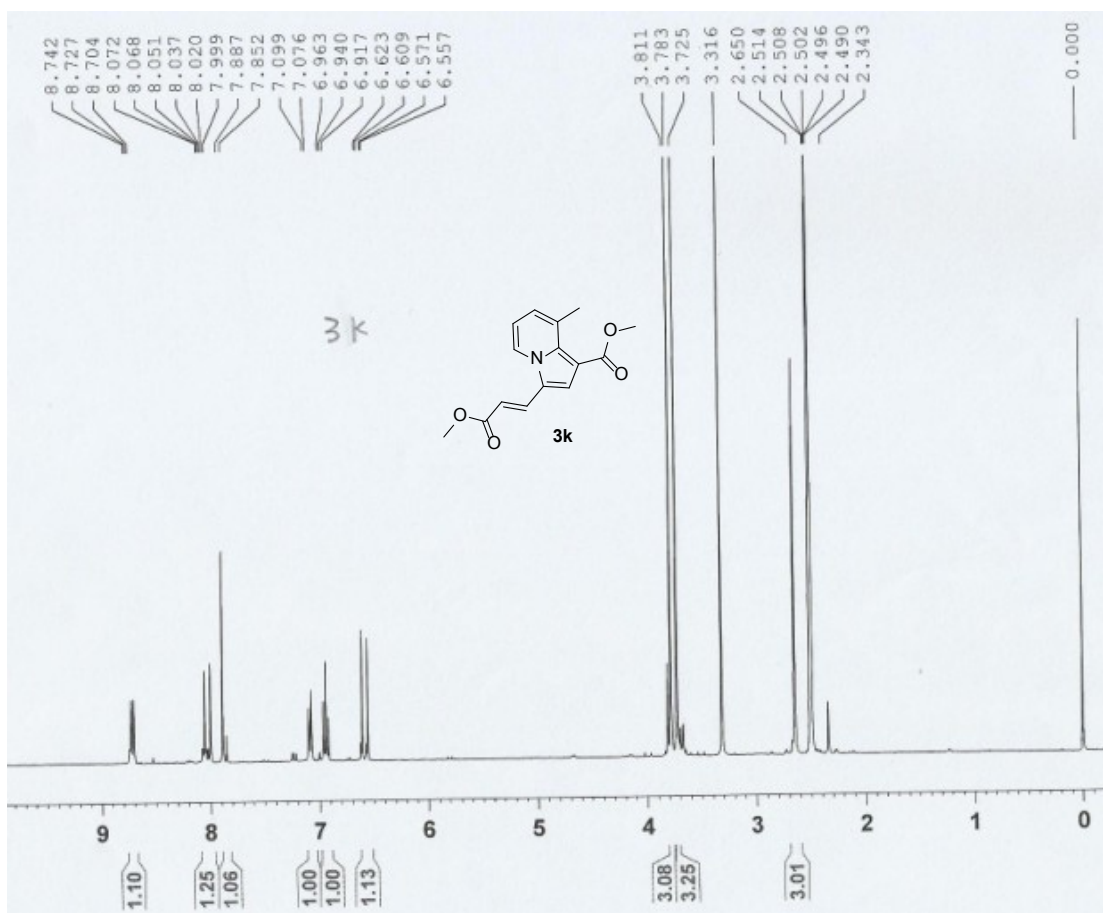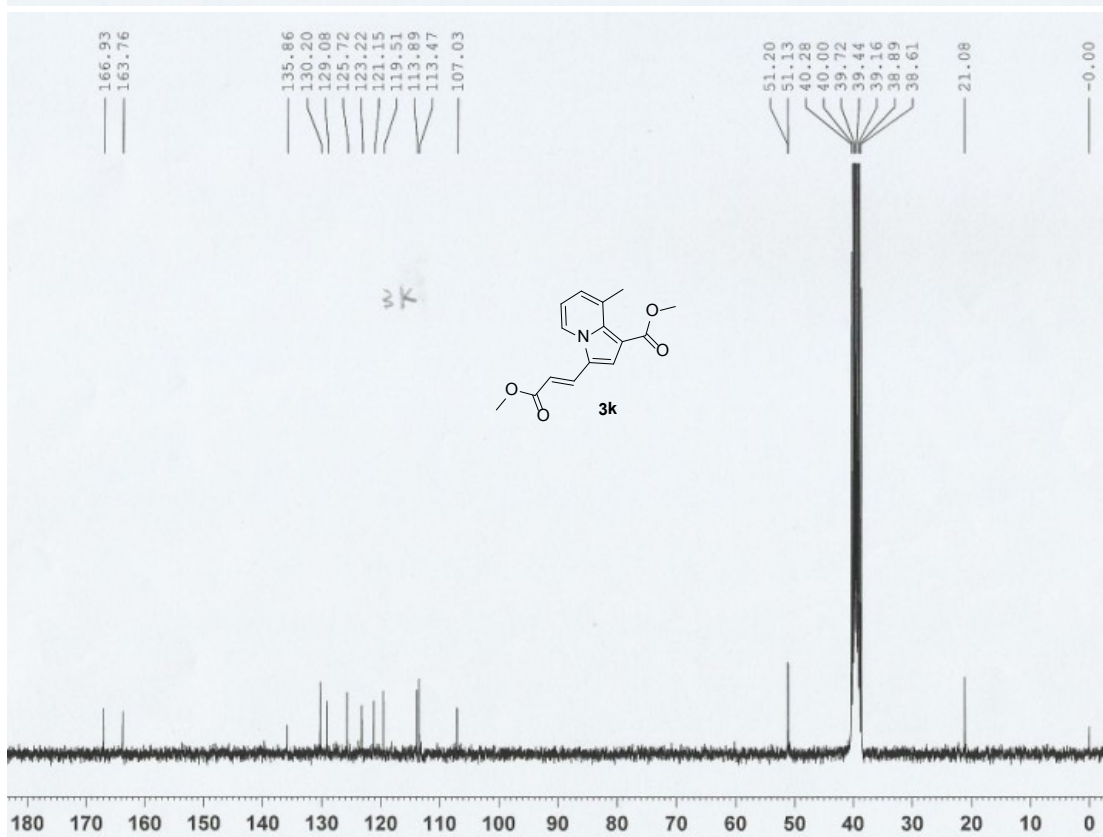

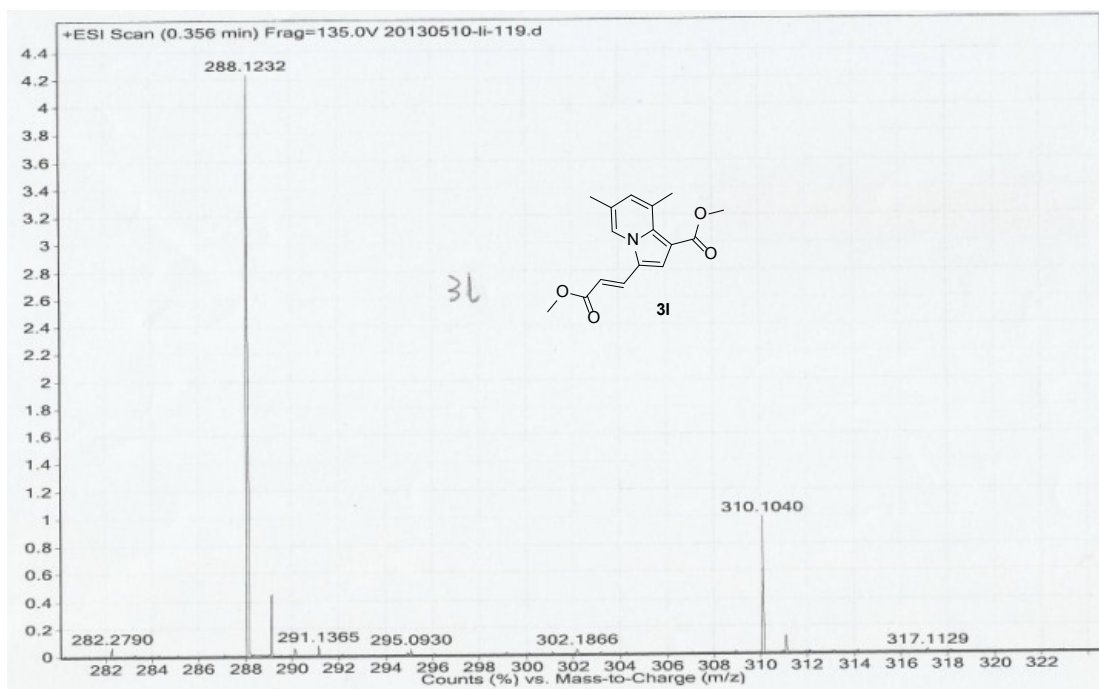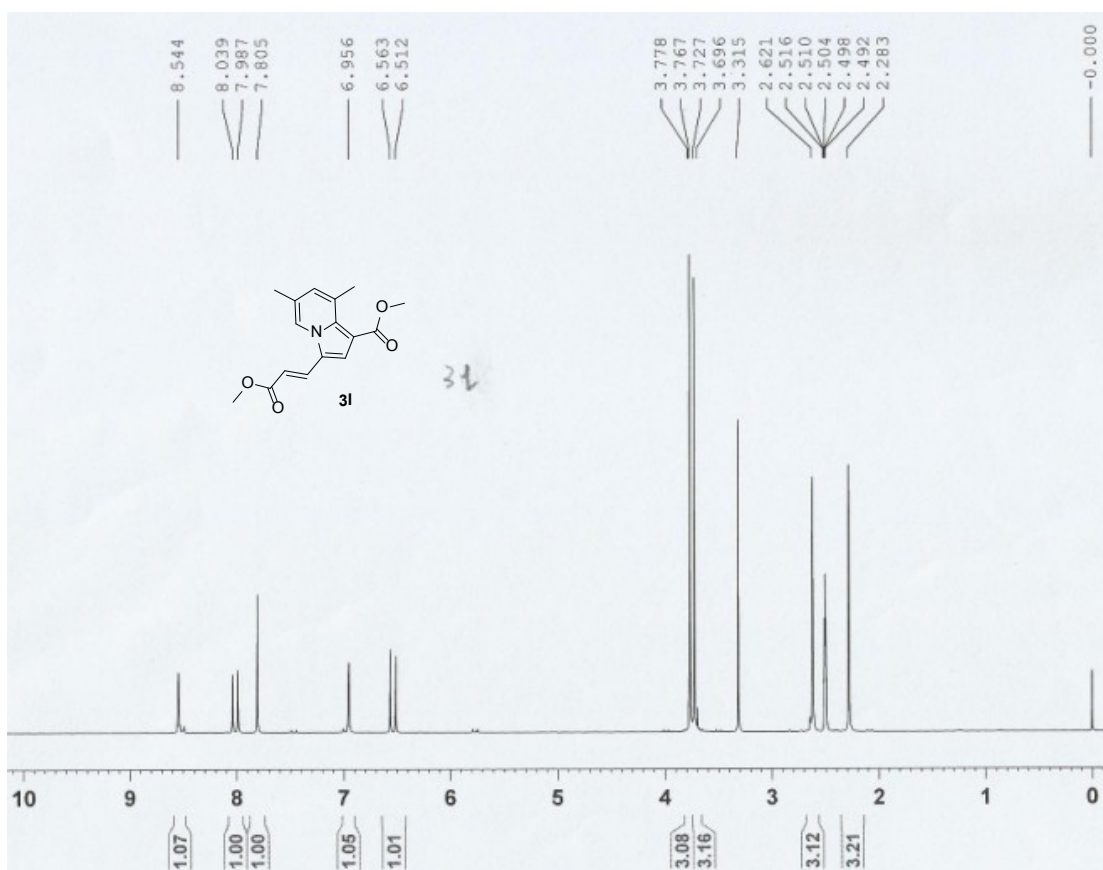



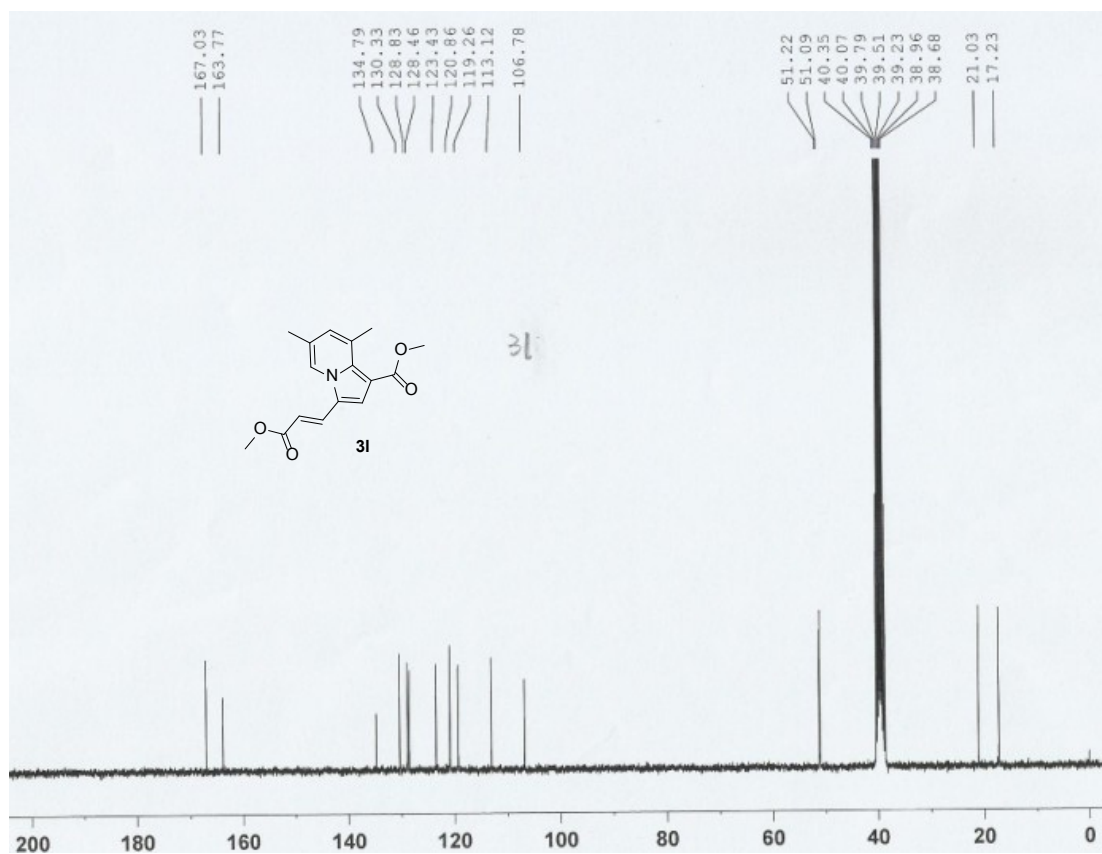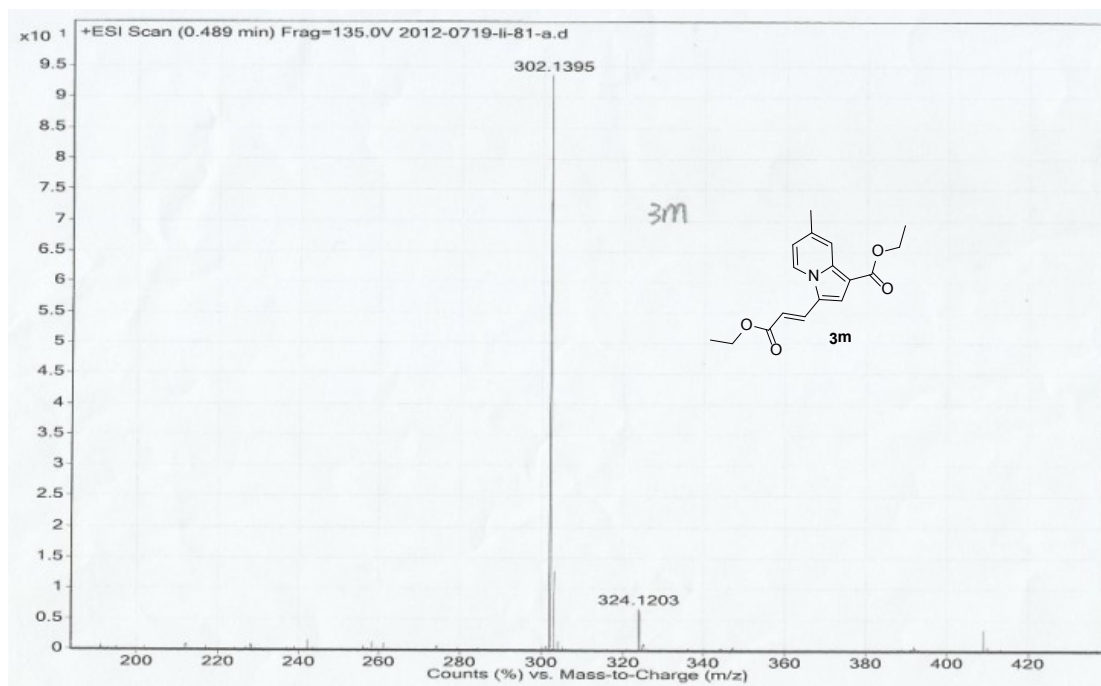



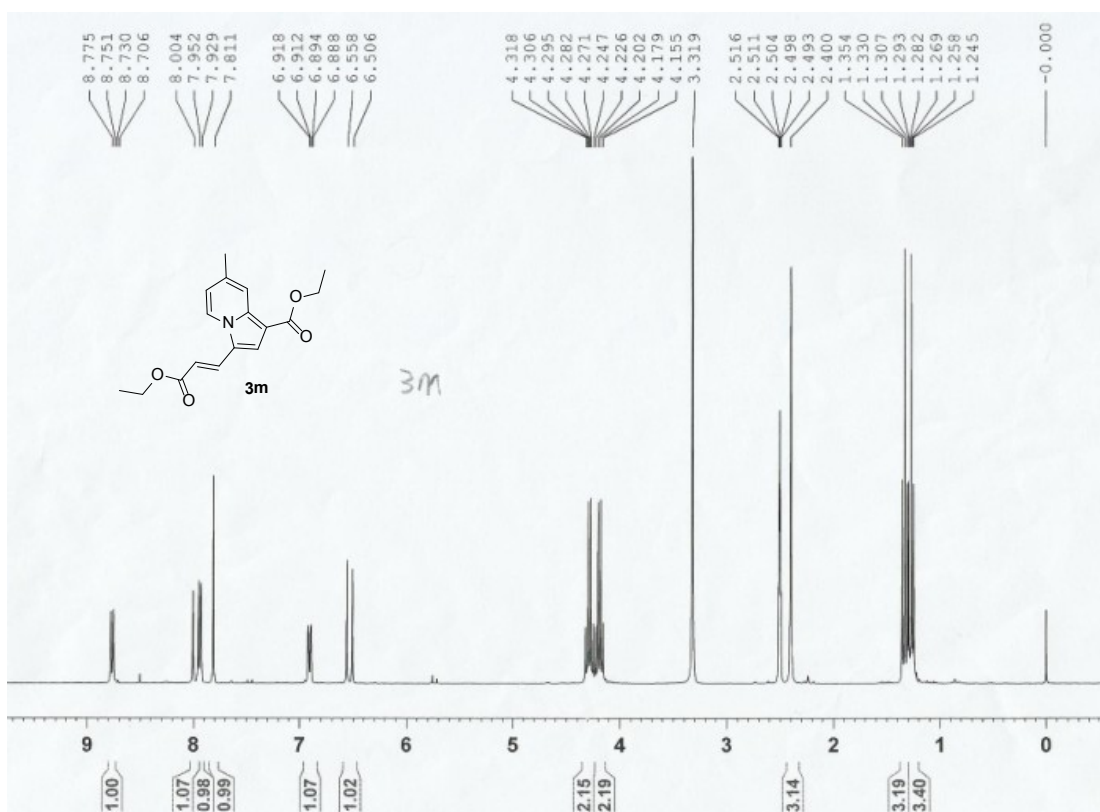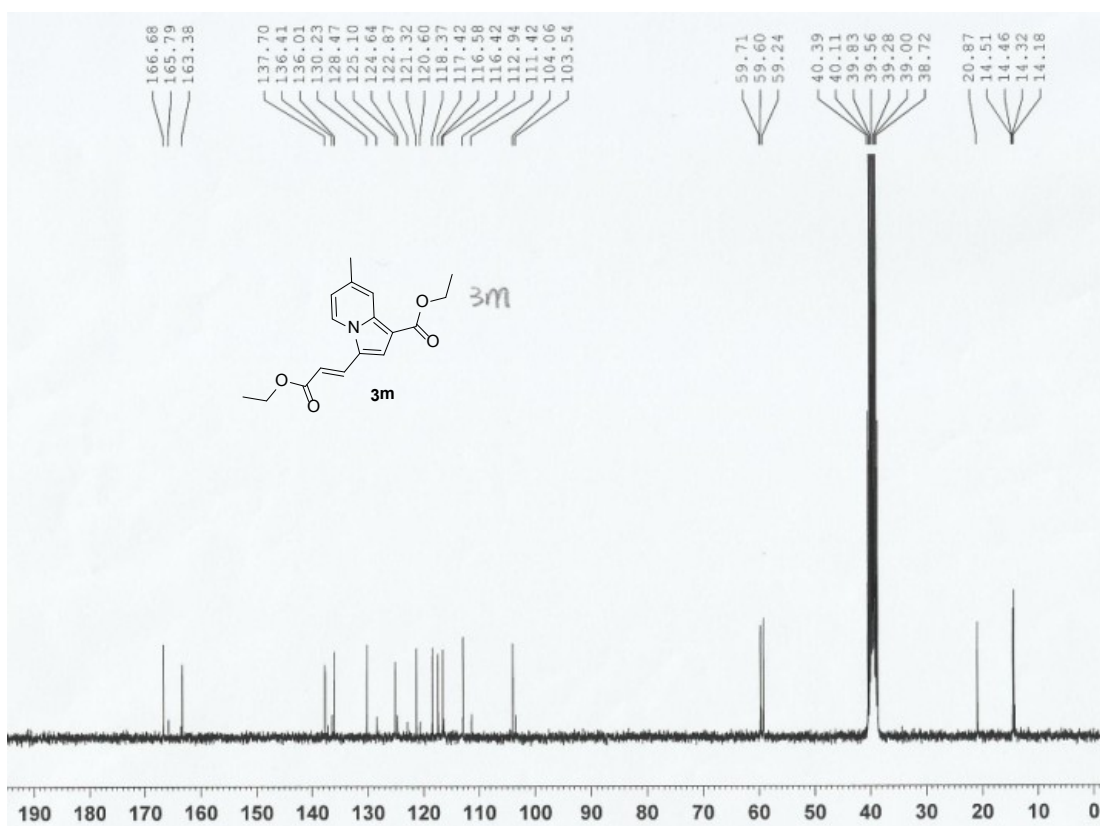

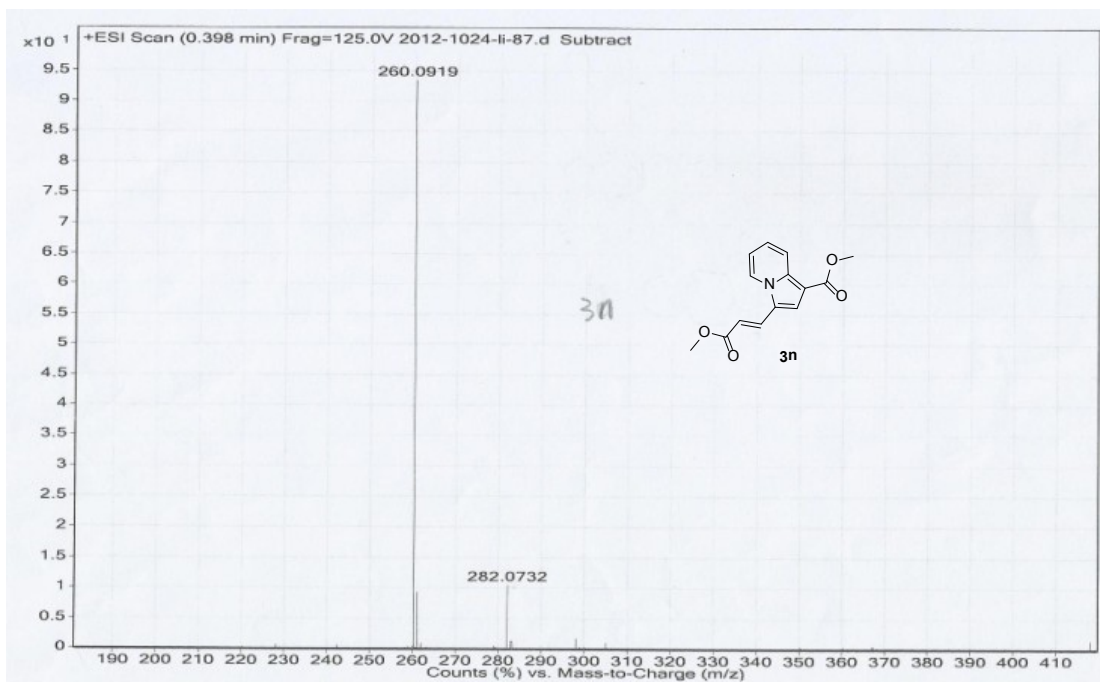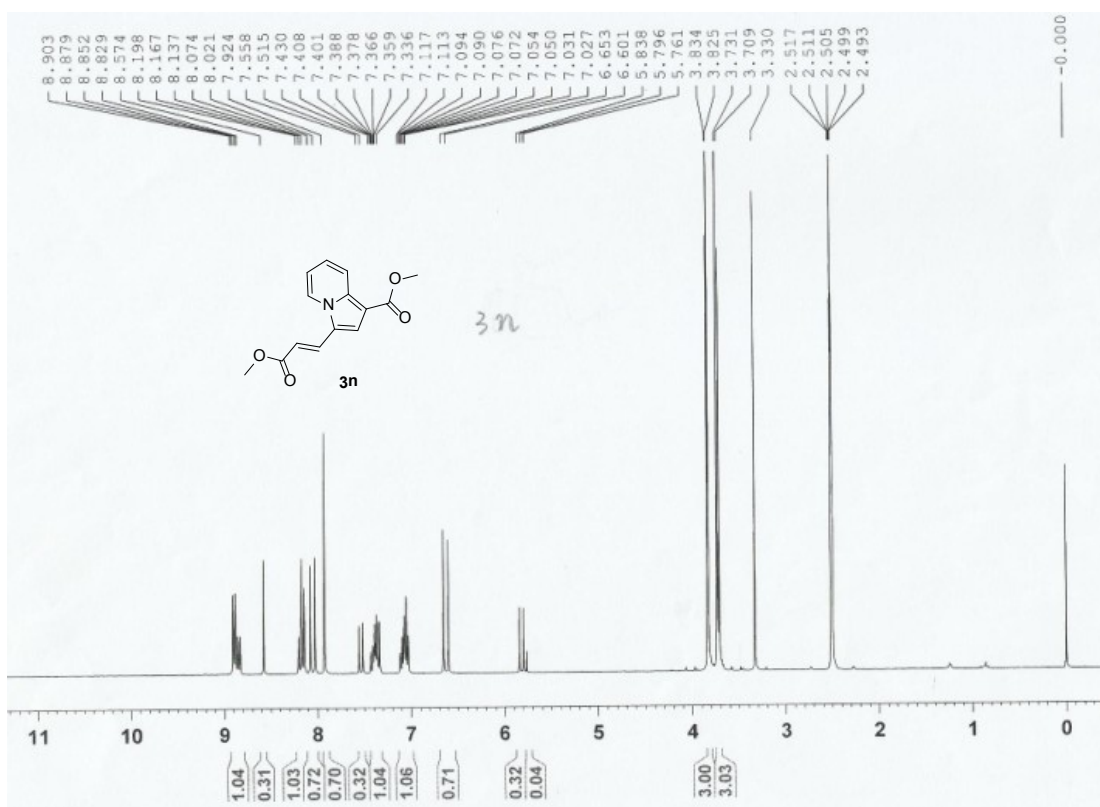

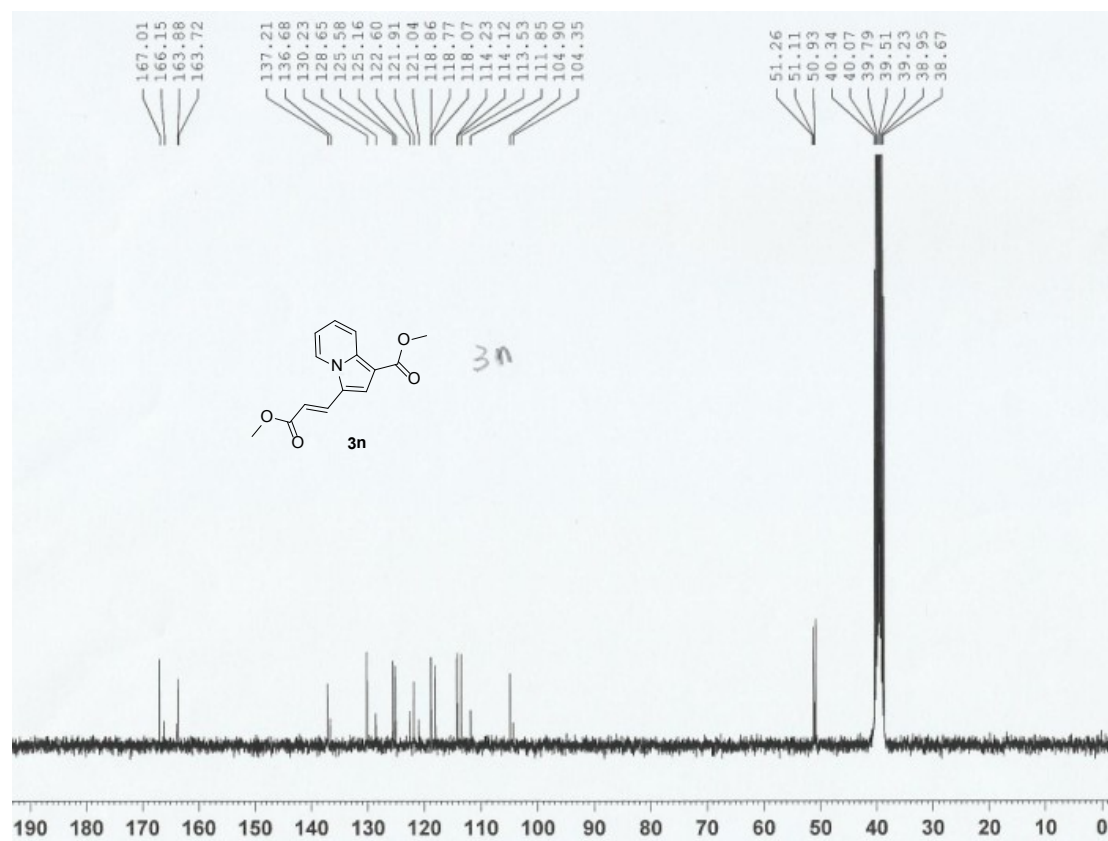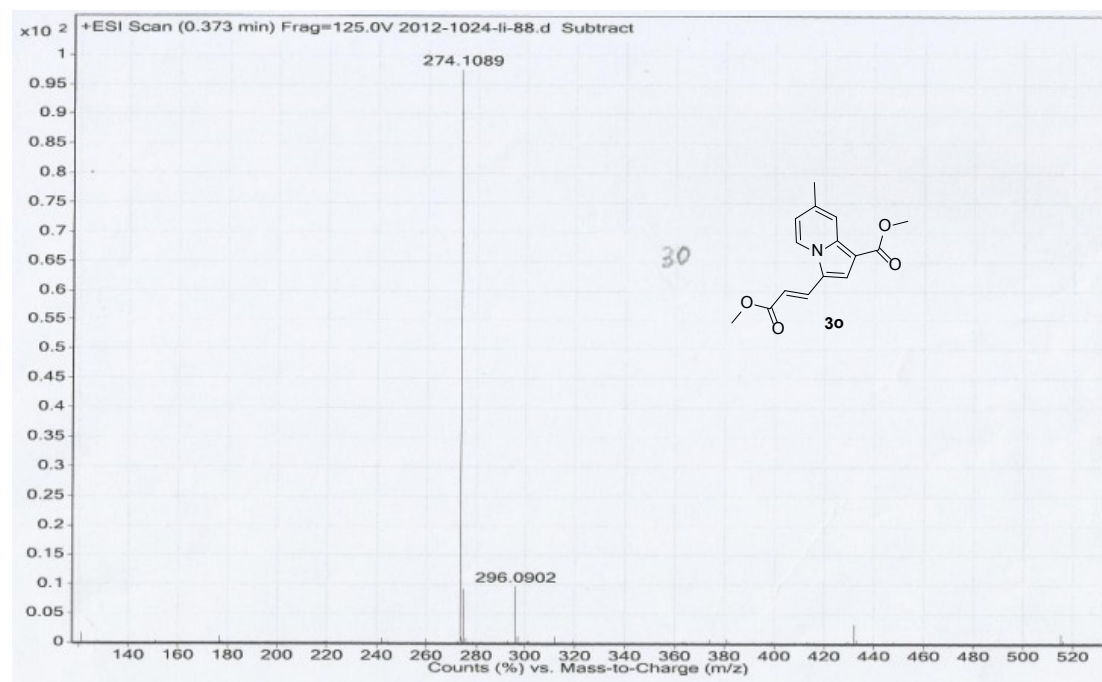

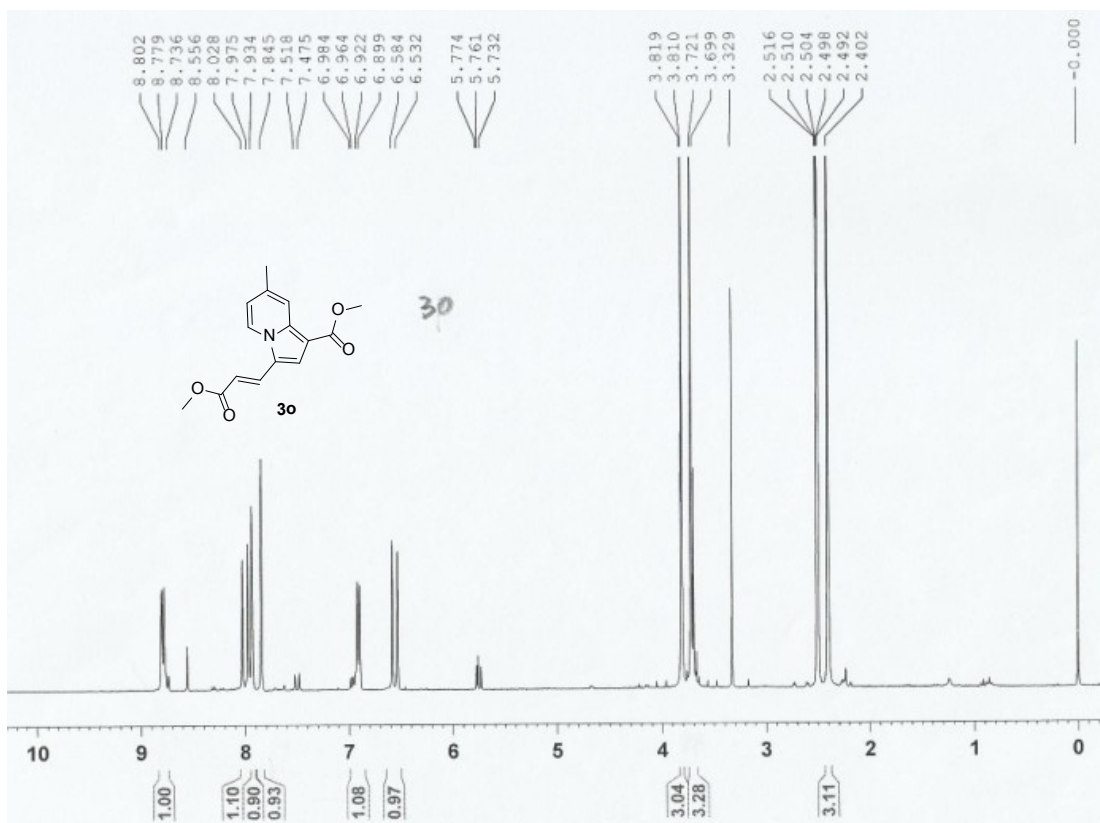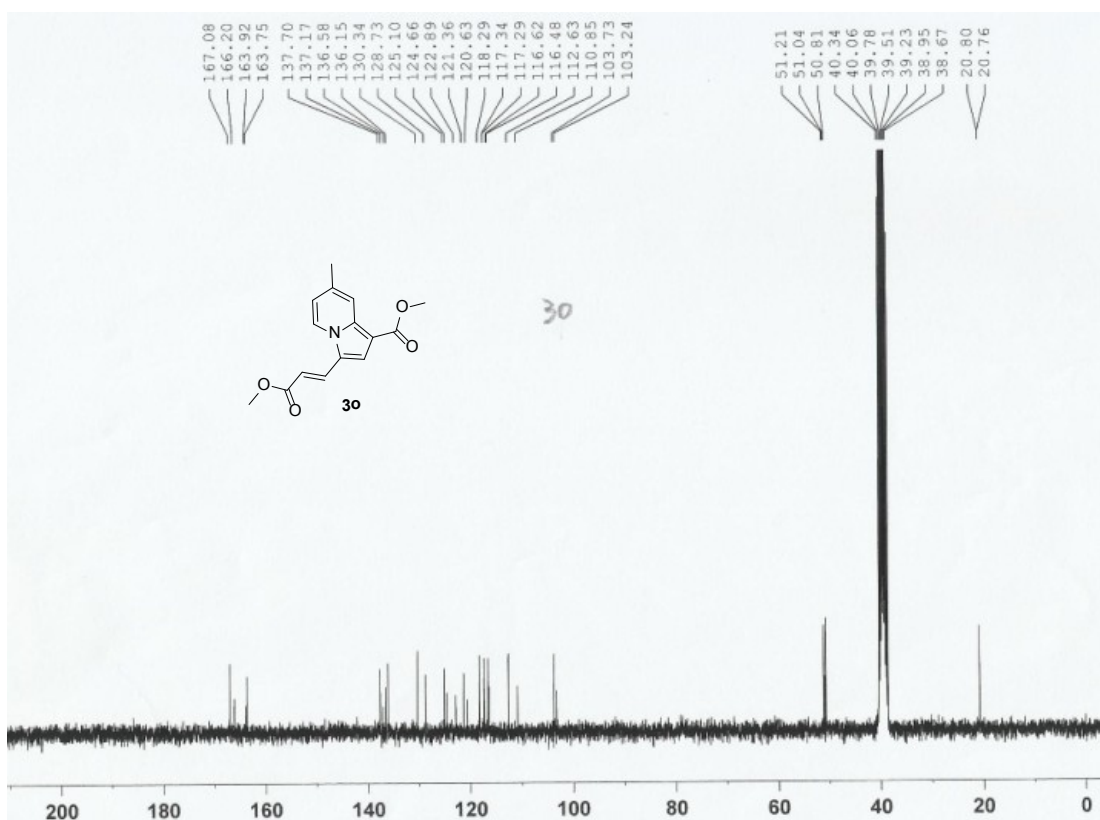

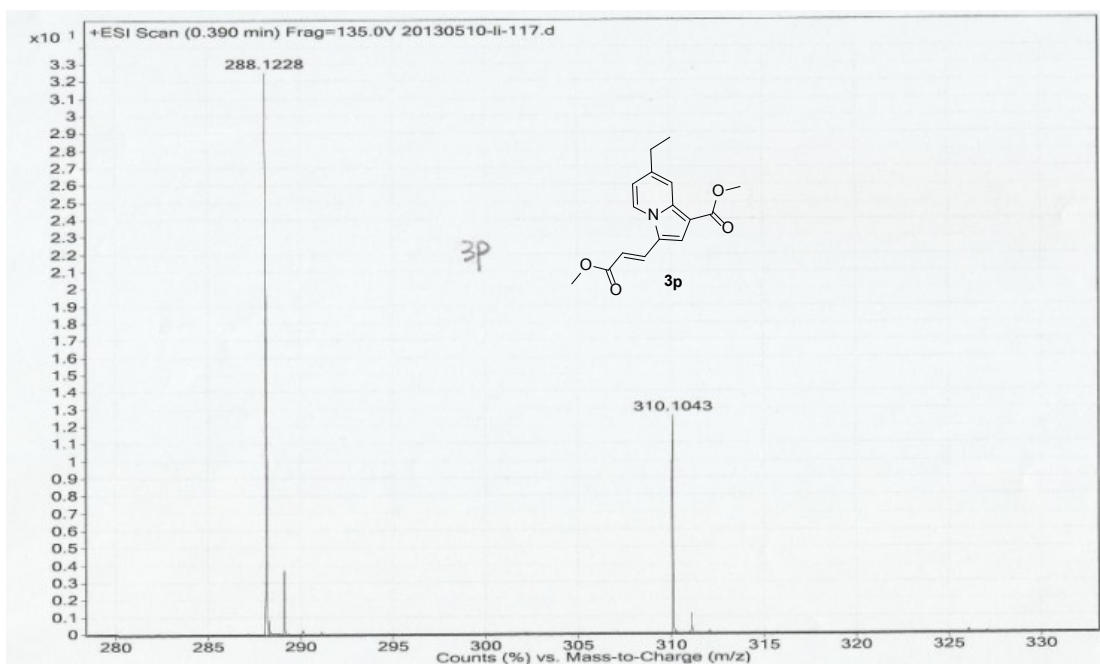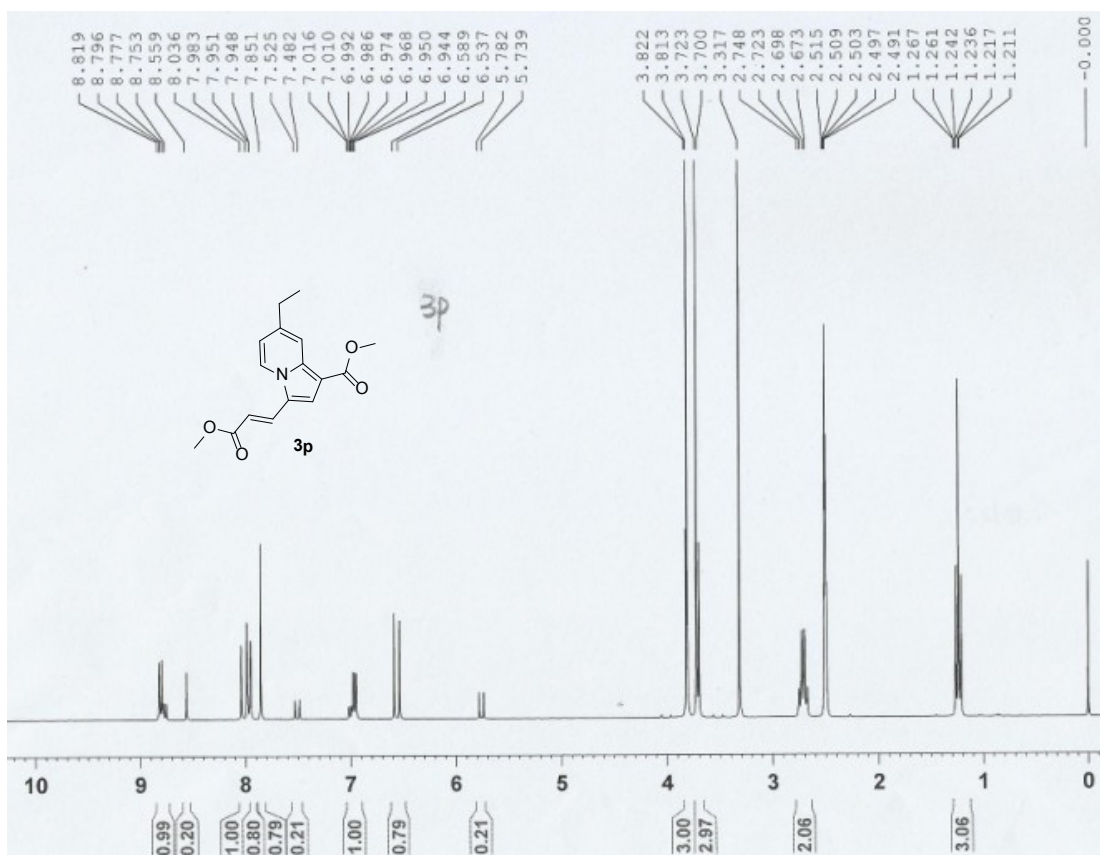



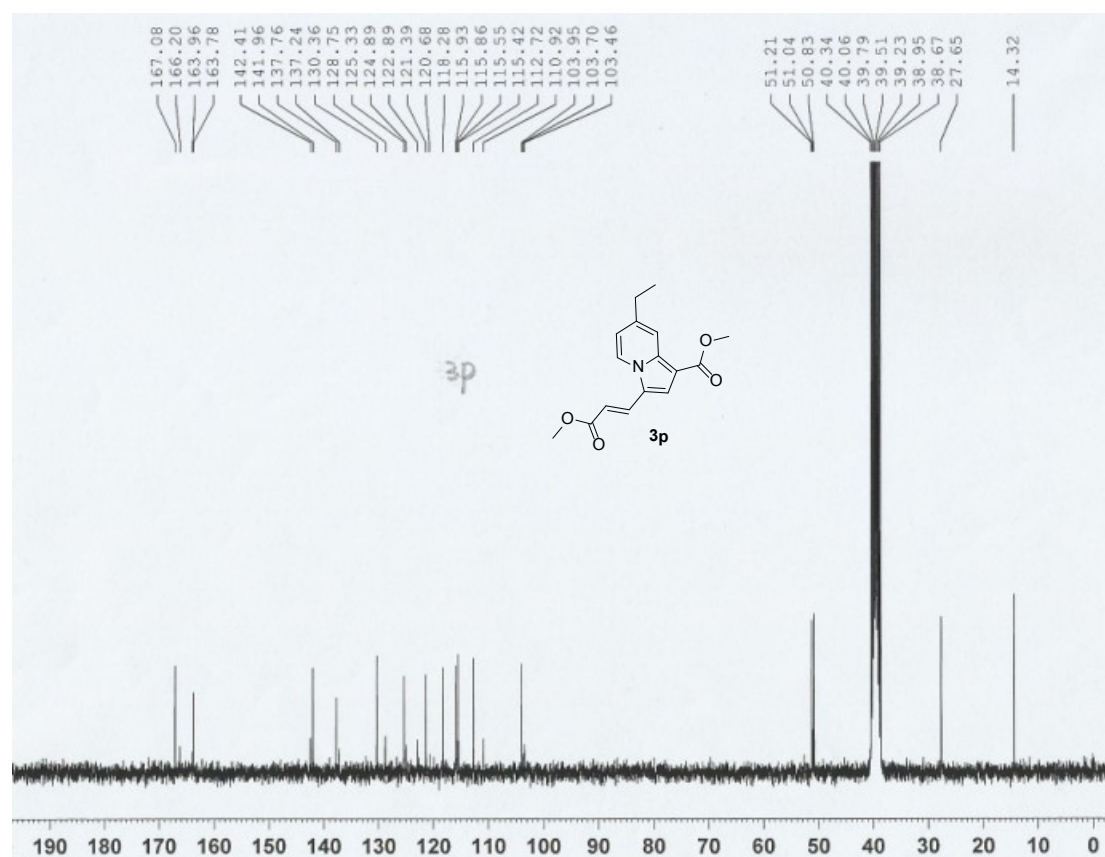



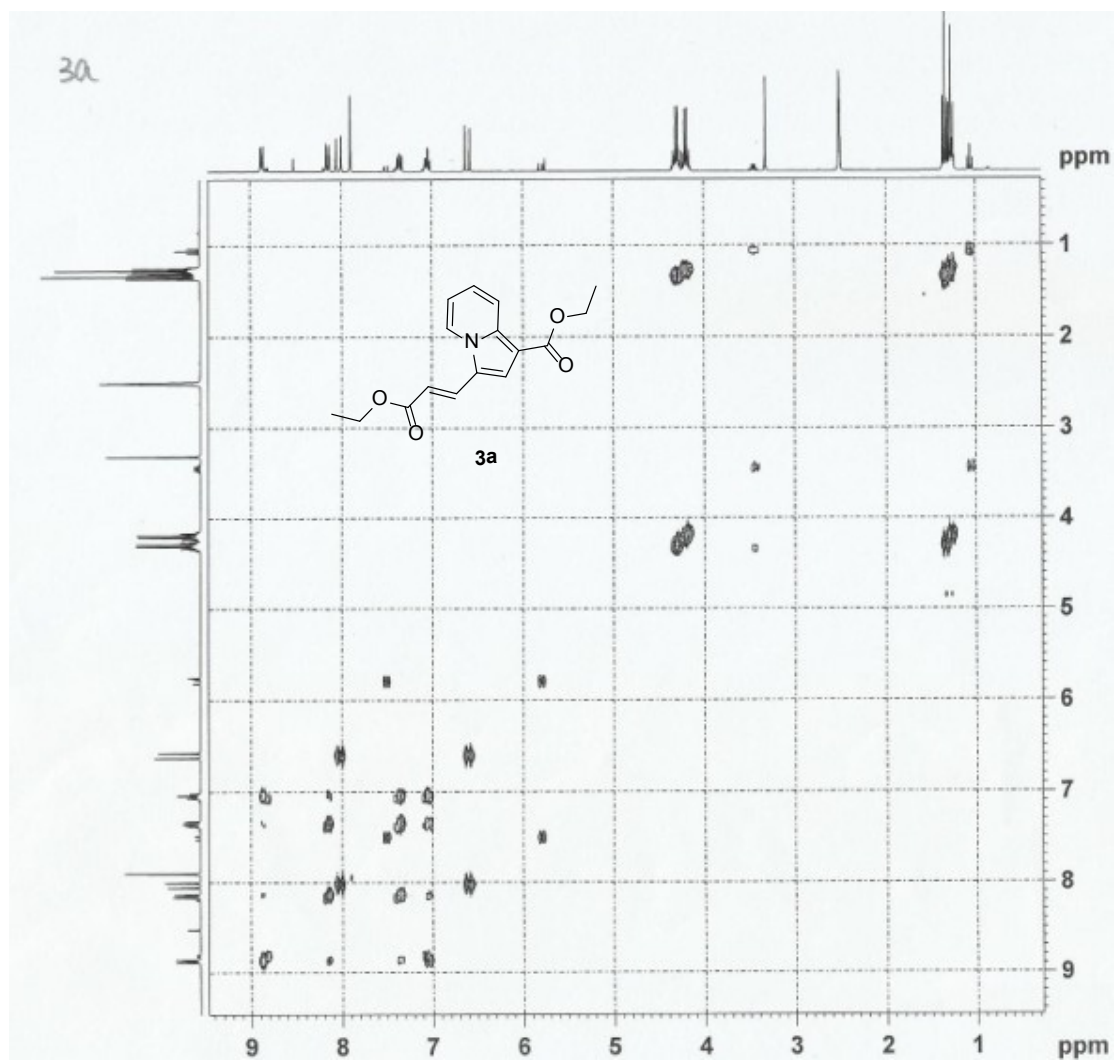

Supplement: c3ra43613f.pdf [file c3ra43613f.pdf]
